# Supplementary material for: Water-based efficient alkyne transformation towards α-acetoxy/imido-ketones via oxidative coupling reactions using an alkylamine catalyst
Source: Royal Society of Chemistry journal article supplement (doi:10.1039/d3ob00582h), 2023-01-01

## Electronic Supplementary Information

### Water-based efficient alkyne transformation towards $\alpha$ -acetoxy/imido-ketones *via* oxidative coupling reactions using an alkylamine catalyst

Debasish Ghosh,<sup>a</sup> Aniruddha Ganguly<sup>b</sup> and Saikat Khamarui<sup>\*c</sup>

<sup>a</sup>Department of Chemistry, Vivekananda College Madhyamgram, Kolkata-700129, India

<sup>b</sup>Department of Chemistry, Scottish Church College, Kolkata-700006, India, e-mail: ani.physichem@gmail.com

<sup>c</sup>Department of Chemistry, Government General Degree College at Kalna-1, Purba Bardhaman-713405, India

\*Corresponding author: e-mail: [saikatkhamarui21@gmail.com](mailto:saikatkhamarui21@gmail.com); Tel: 91-8017685951

| <u>Serial No.</u> | <u>Content</u>                                                                                                                                                                                                                                                     | <u>Page Numbers</u> |
|-------------------|--------------------------------------------------------------------------------------------------------------------------------------------------------------------------------------------------------------------------------------------------------------------|---------------------|
| 1.                | Control experiments data                                                                                                                                                                                                                                           | S-2                 |
| 2.                | <sup>1</sup> H and <sup>13</sup> C-NMR spectra of synthesised $\alpha$ -acetoxyketones ( <b>4a-g</b> ), $\alpha$ -imidoketones ( <b>5a-g</b> ), <i>N</i> -protected cathinone ( <b>6a</b> ), cathinone ( <b>7</b> ) and <i>N</i> -benzoylphthalimide ( <b>8a</b> ) | S-3                 |

## 1. Control experiments data

### Detection of labeled isotope ( $^{18}\text{O}$ ) using mass spectroscopy

The synthesis of compound **5a** was performed on a 0.1 mmol scale in 1.0 ml  $\text{H}_2^{18}\text{O}$ , following the general procedure as depicted earlier. High-resolution mass spectrometry (HRMS) analysis was then performed directly with the post-reaction mixture. The peak at 267.0784 ( $\text{M}^+$ ) confirmed the incorporation of the  $^{18}\text{O}$  isotope into the desired product ( $^{18}\text{O}$ -**5a**), indicating the source of oxygen in the newly generated  $\alpha$ -functionalised ketones.

### SI Figure 1: HRMS spectrum of $^{18}\text{O}$ -**5a**

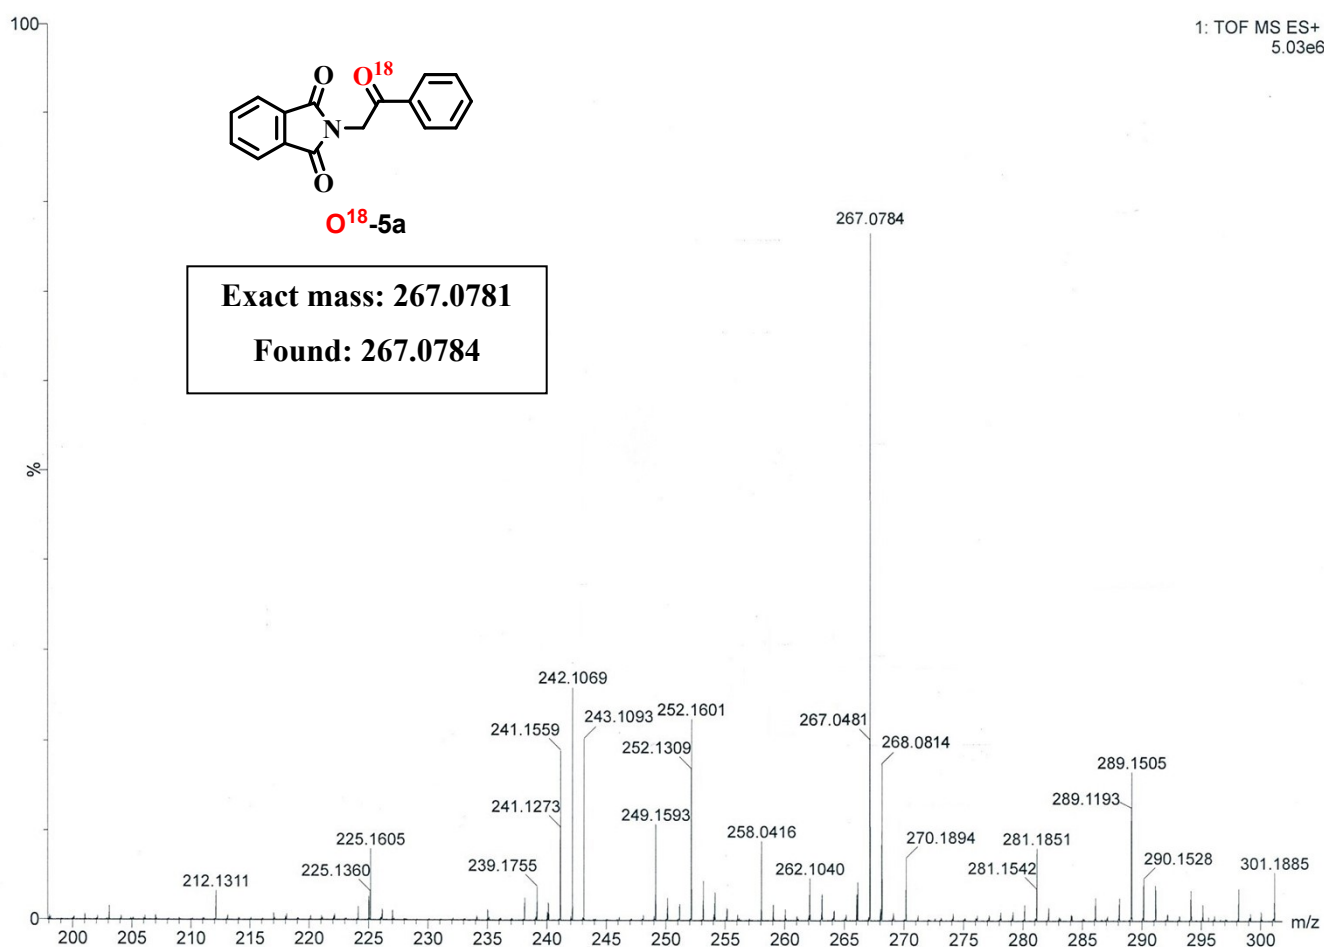

2.  $^1\text{H}$  and  $^{13}\text{C}$ -NMR spectra of synthesised  $\alpha$ -acetoxyketones (4a-g),  $\alpha$ -imidoketones (5a-g), *N*-phthalimido cathinone (6a), cathinone (7) and *N*-benzoylphthalimide (8a)

SI Figure 2:  $^1\text{H}$  and  $^{13}\text{C}$ -NMR spectra of compound 4a

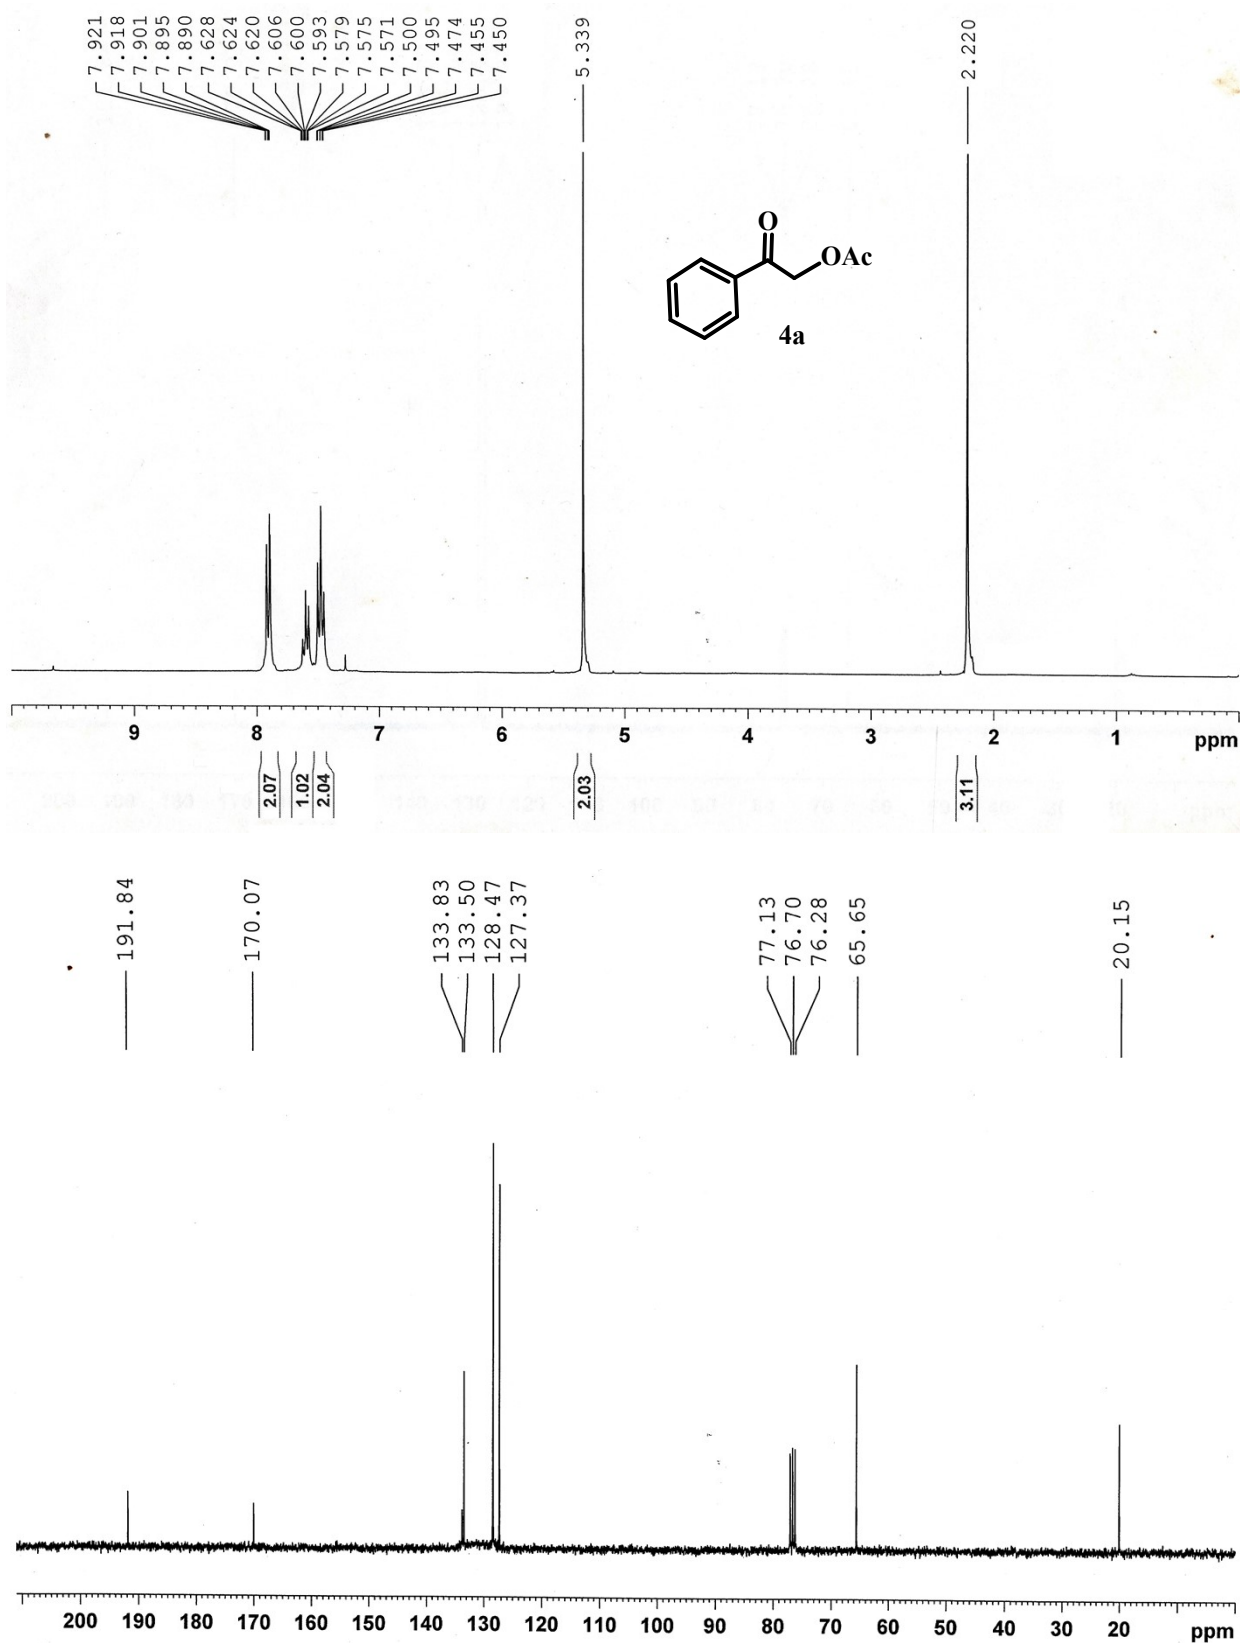

SI Figure 3:  $^1\text{H}$  and  $^{13}\text{C}$ -NMR spectra of compound **4b**

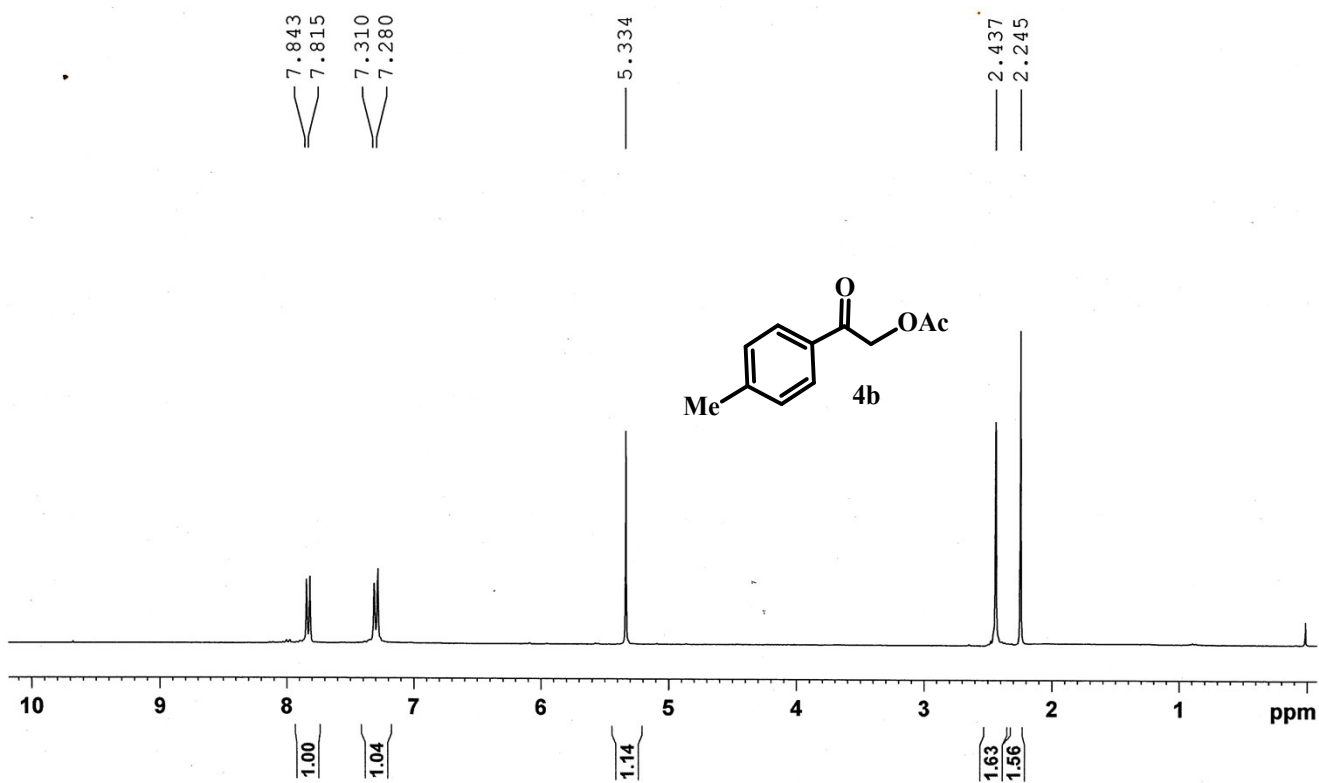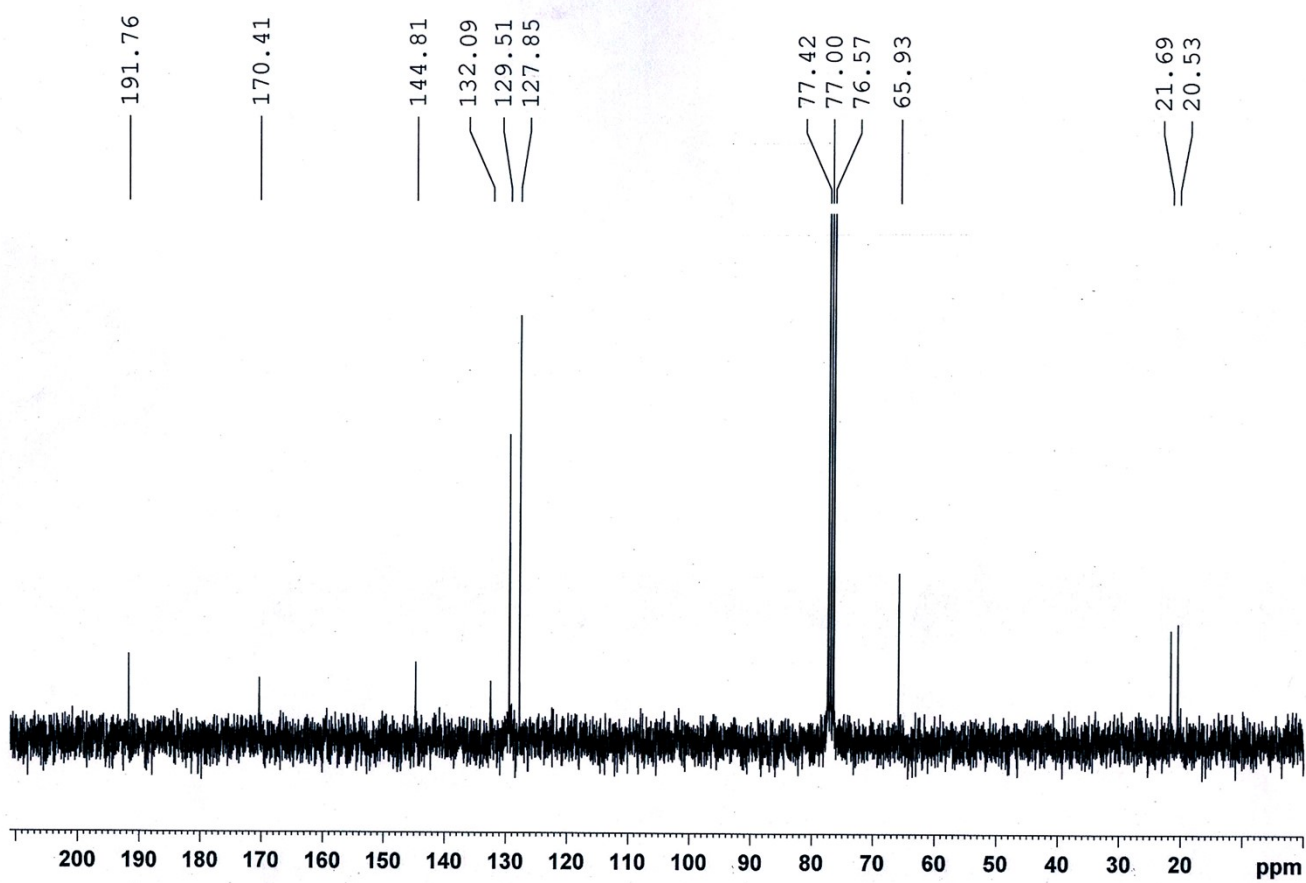

SI Figure 4:  $^1\text{H}$  and  $^{13}\text{C}$ -NMR spectra of compound **4c**

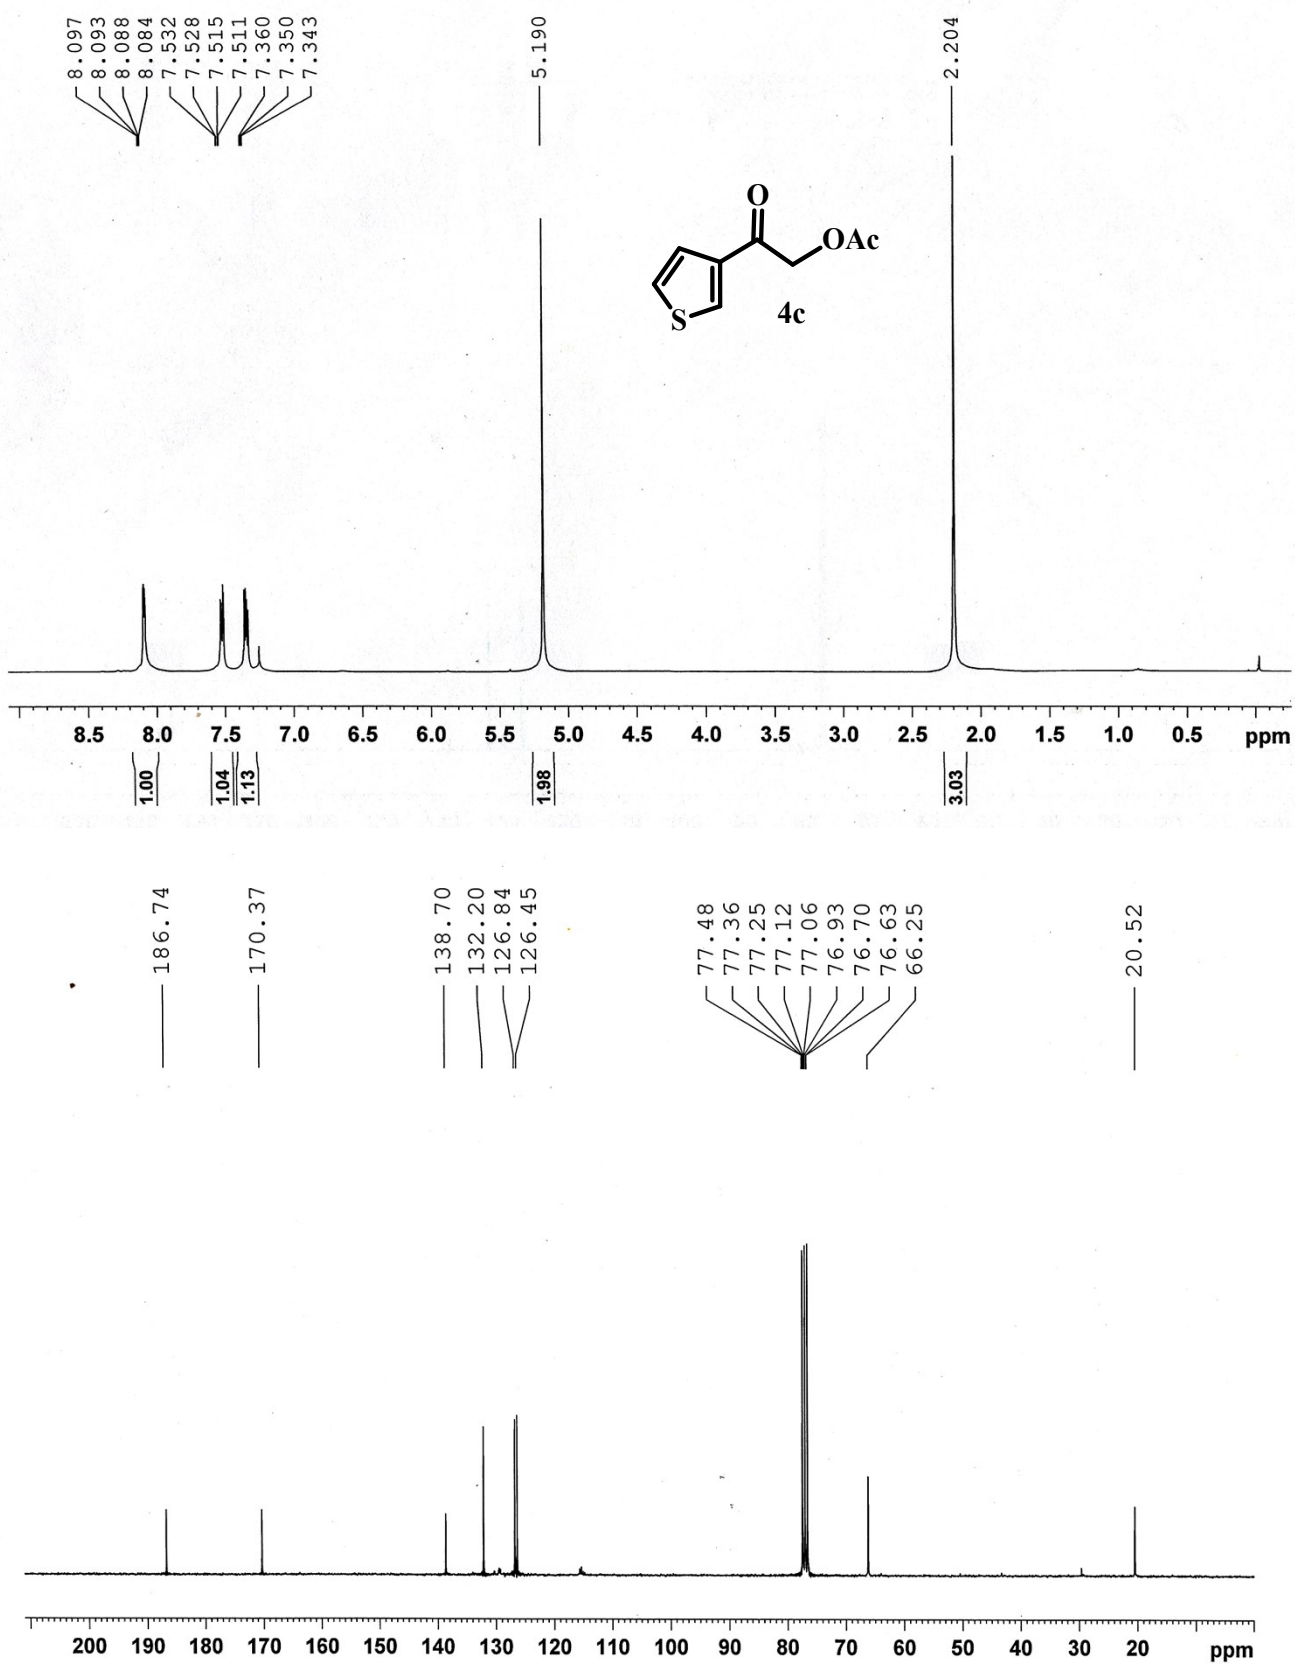

SI Figure 5:  $^1\text{H}$  and  $^{13}\text{C}$ -NMR spectra of compound **4d**

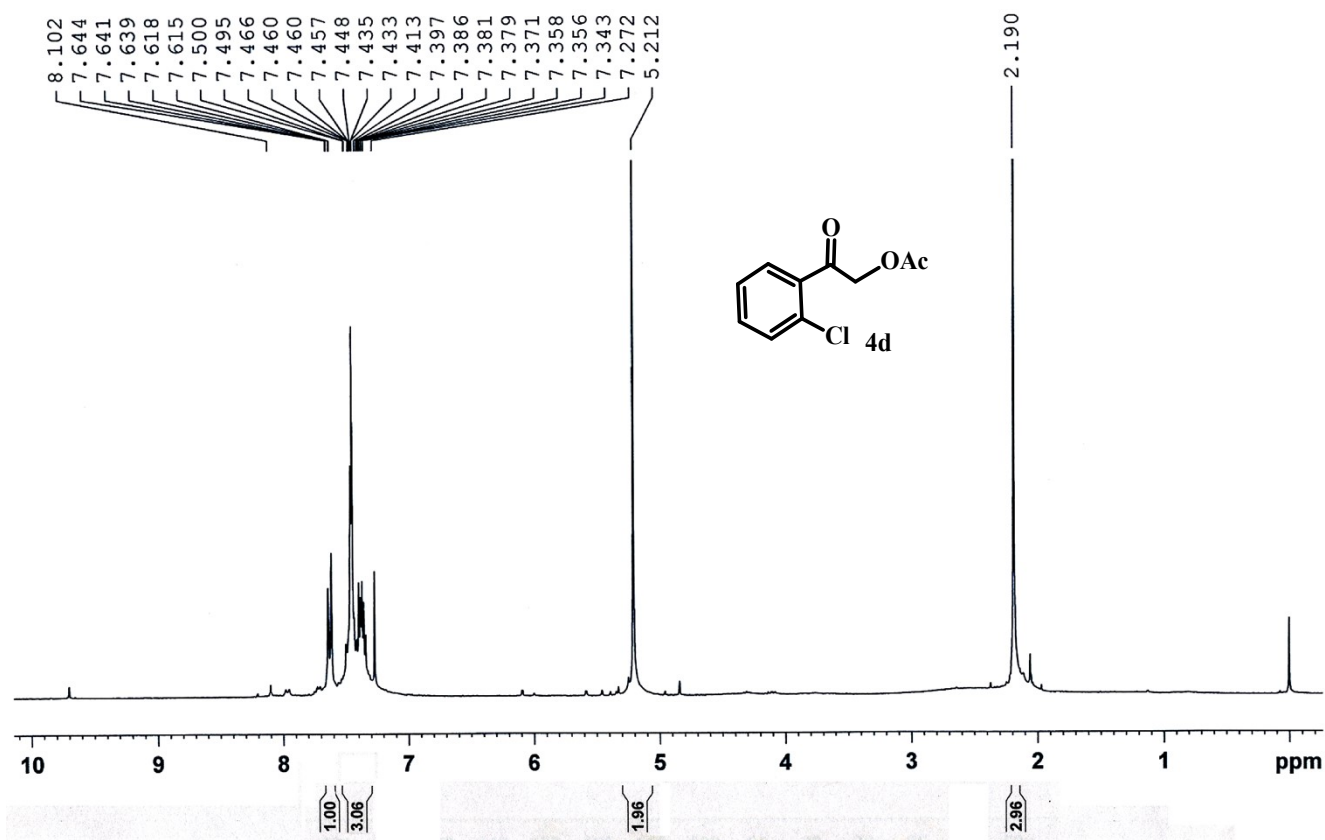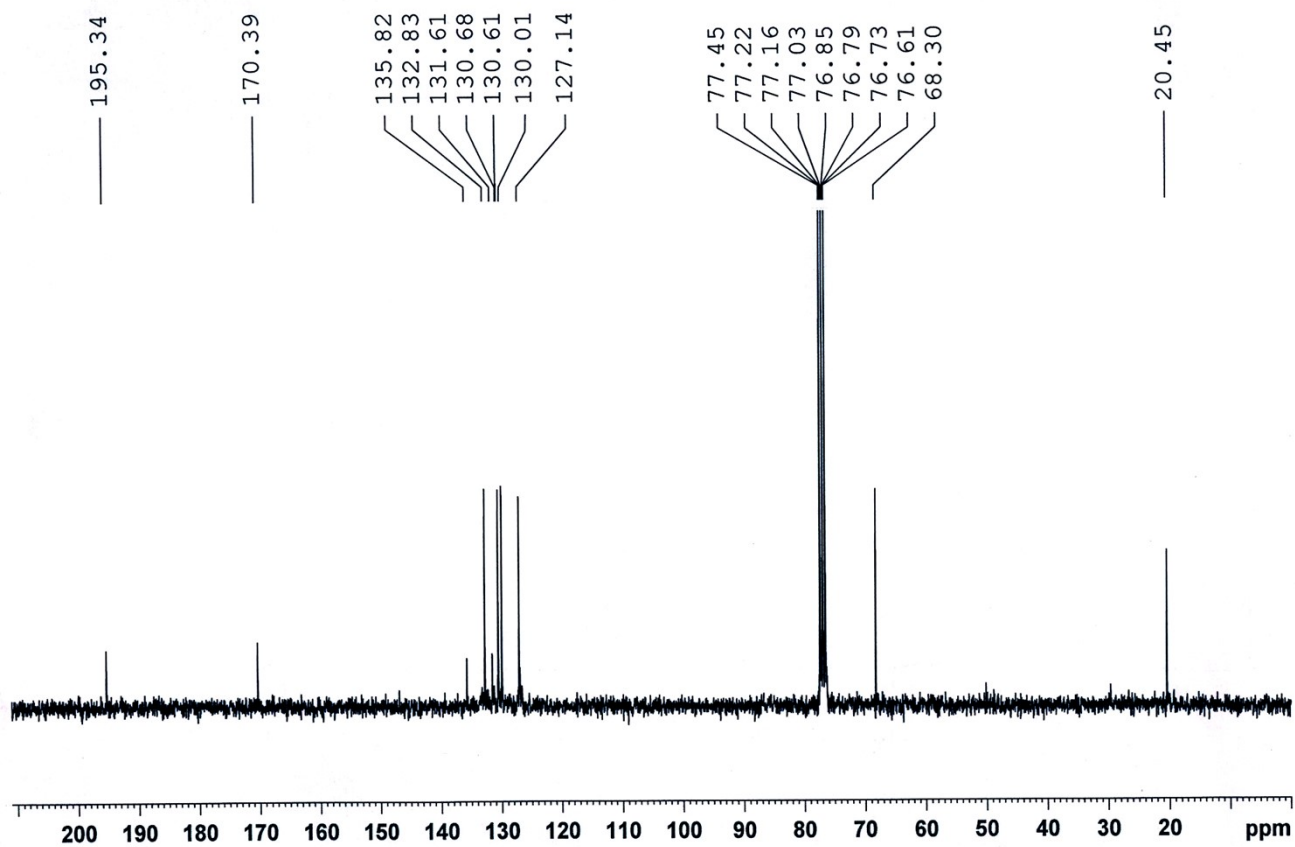

SI Figure 6:  $^1\text{H}$  and  $^{13}\text{C}$ -NMR spectra of compound 4e

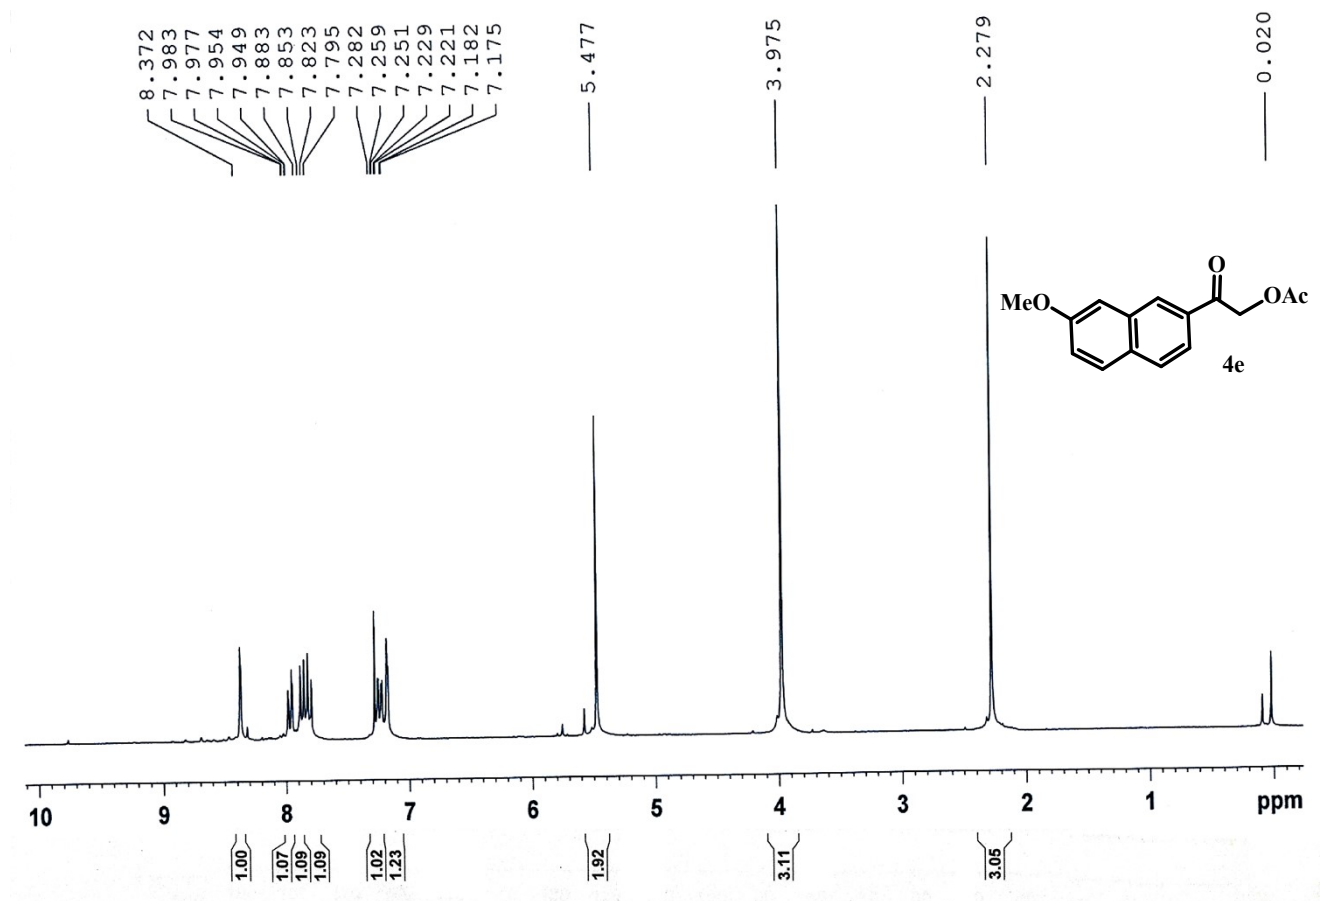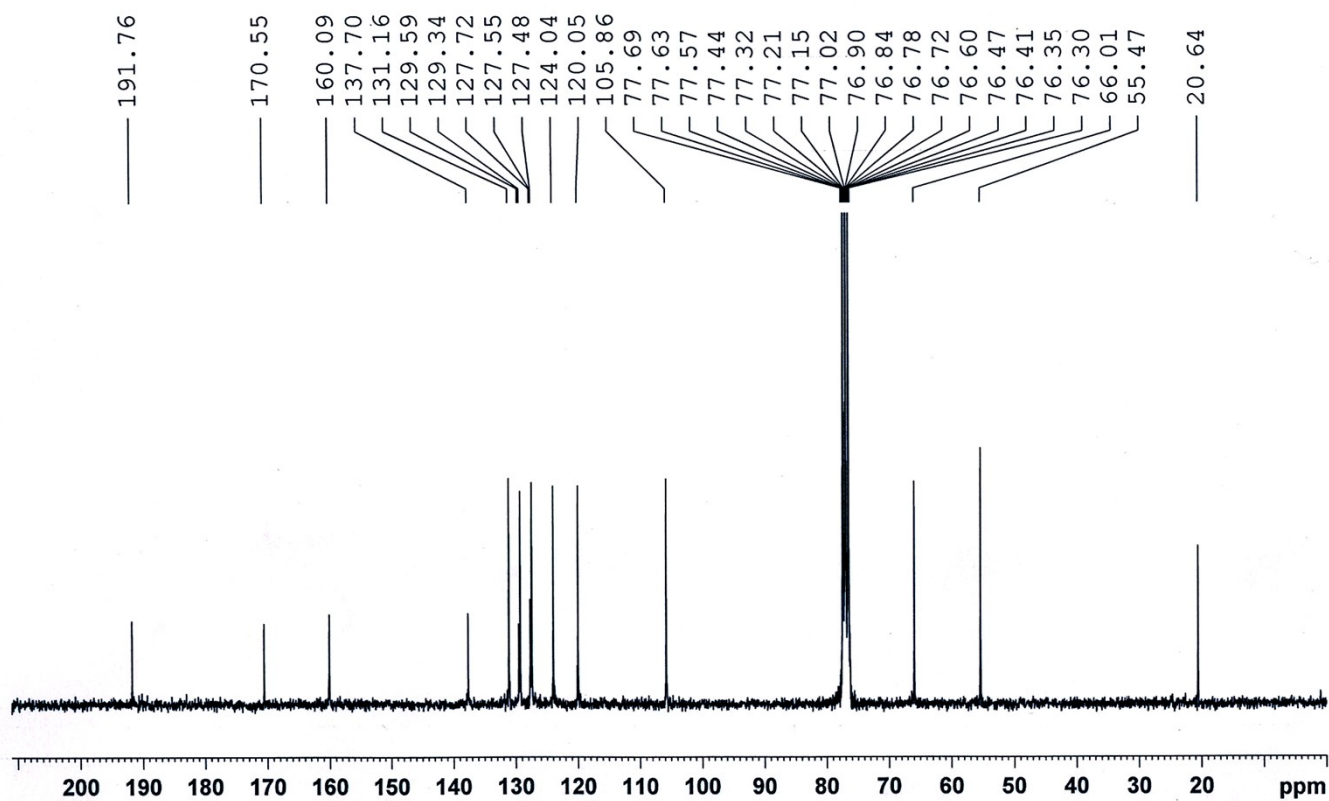

SI Figure 7:  $^1\text{H}$  and  $^{13}\text{C}$ -NMR spectra of compound **4f**

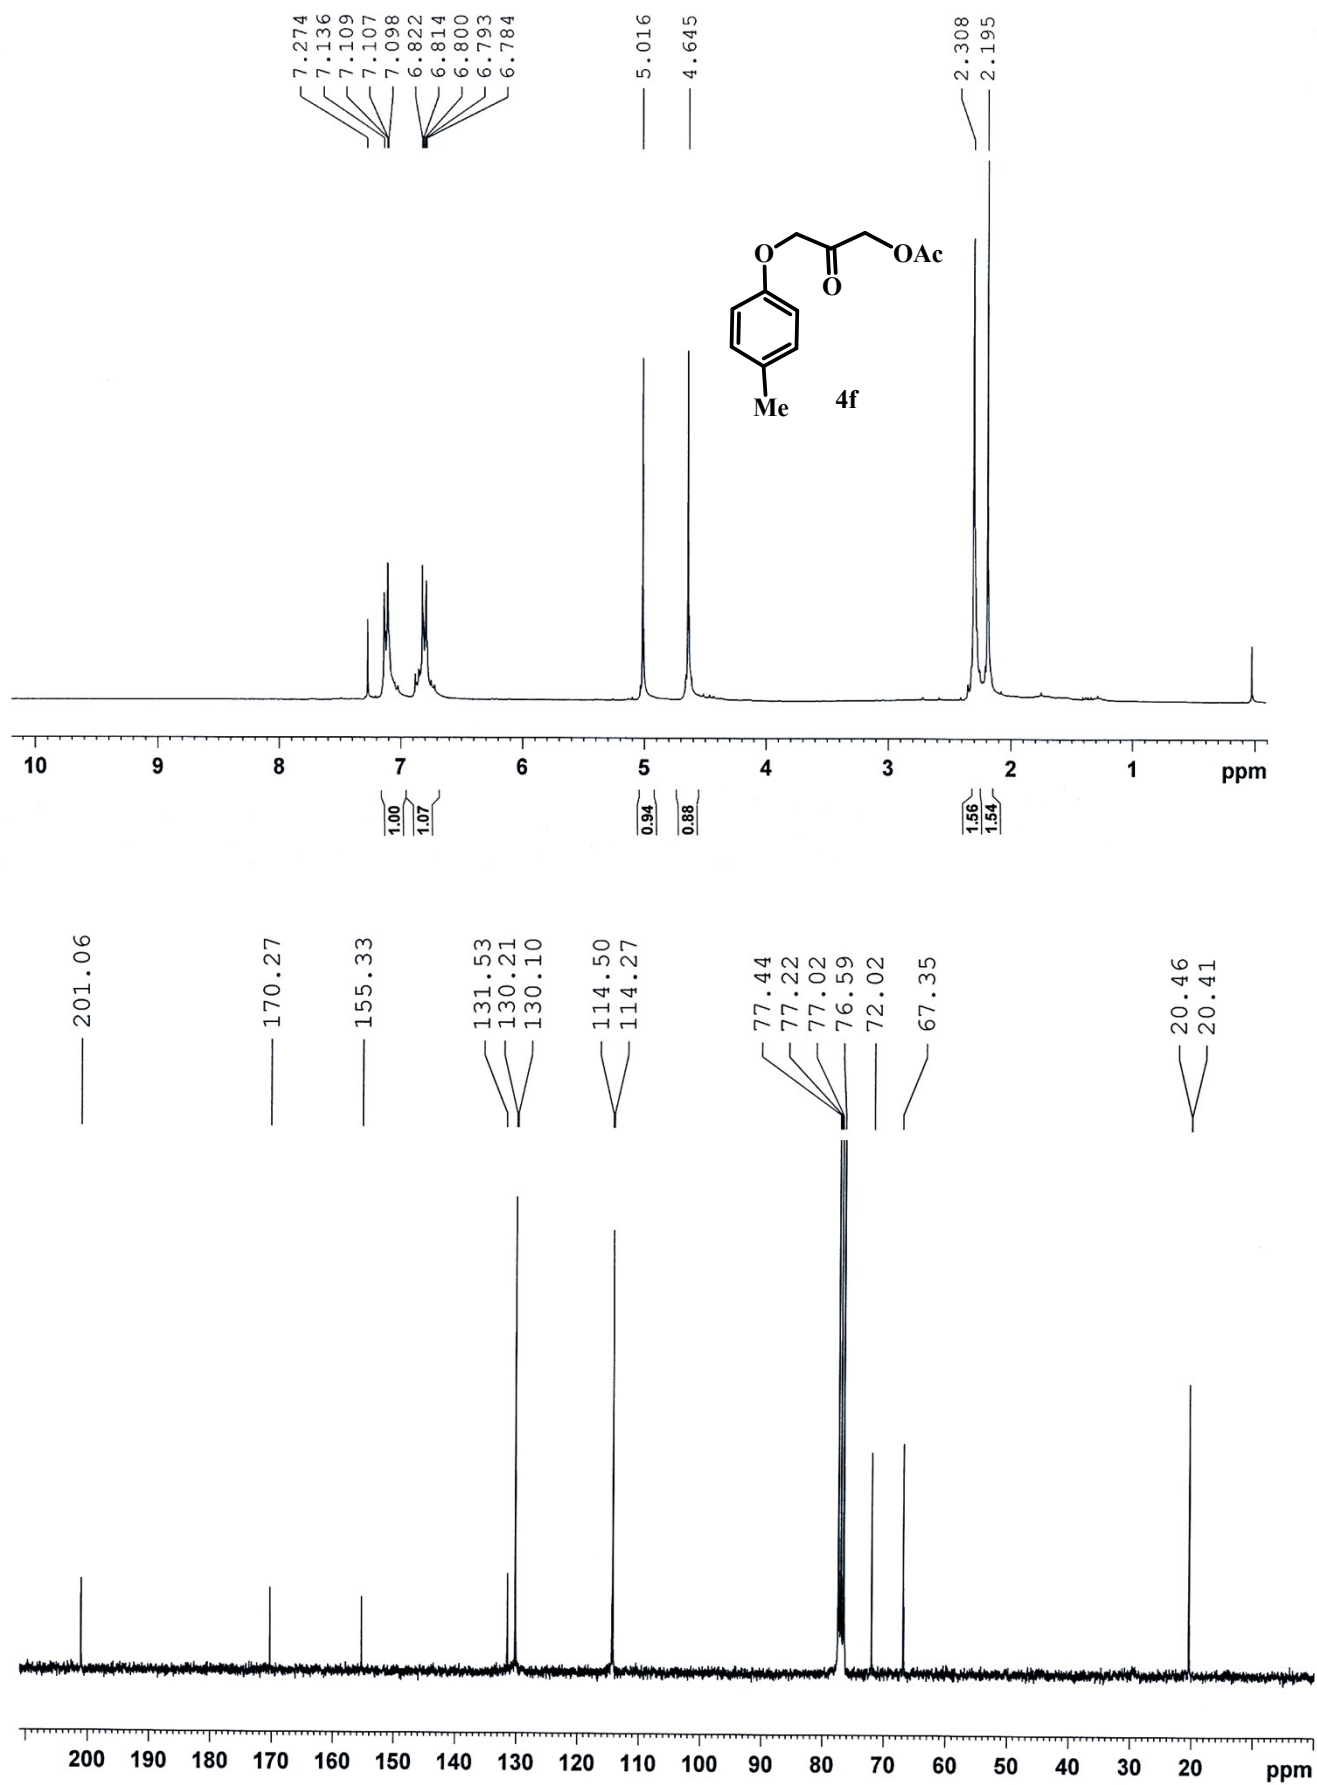



SI Figure 8:  $^1\text{H}$  and  $^{13}\text{C}$ -NMR spectra of compound **4g**

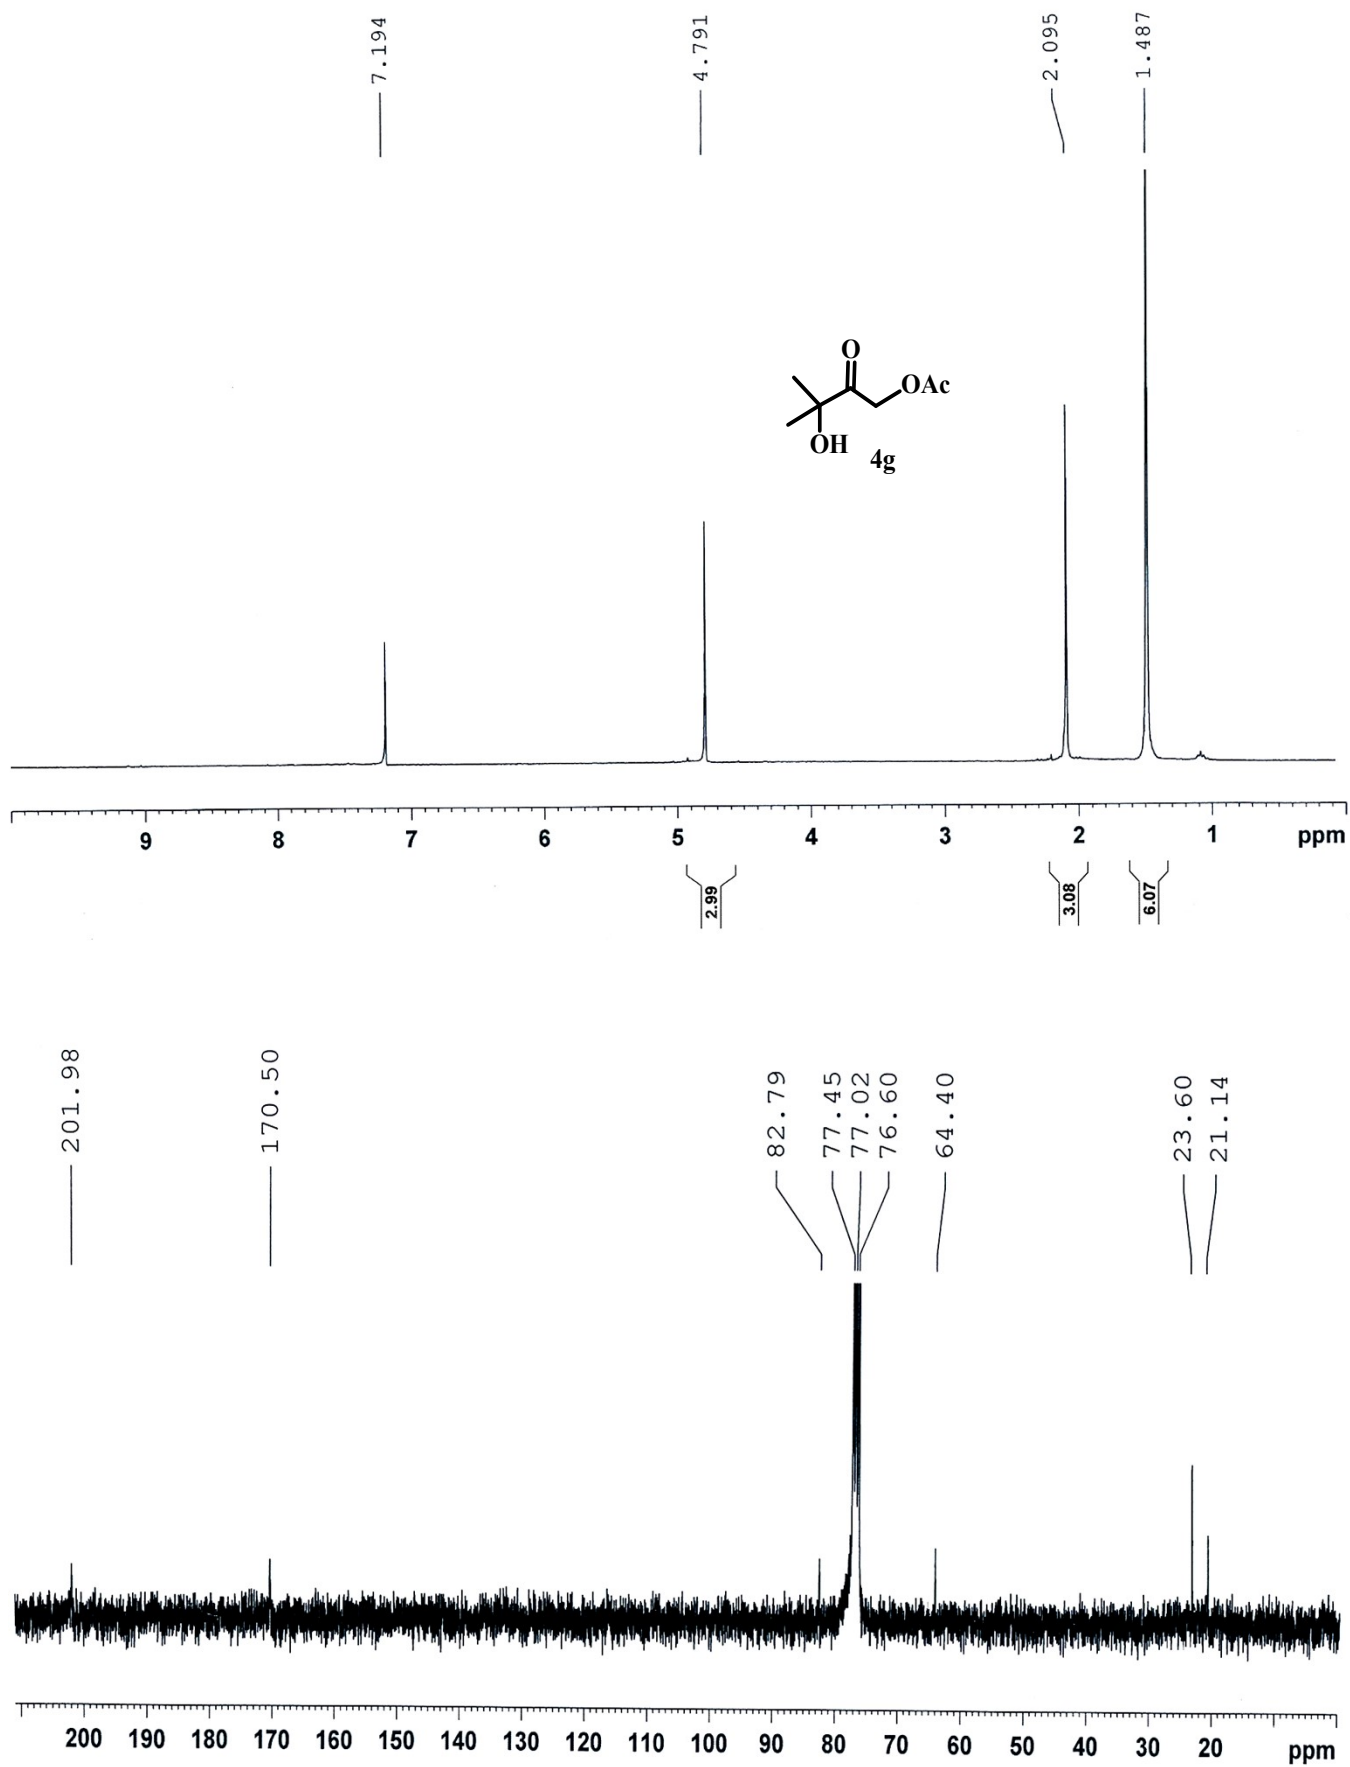

SI Figure 9:  $^1\text{H}$  and  $^{13}\text{C}$ -NMR spectra of compound **5a**

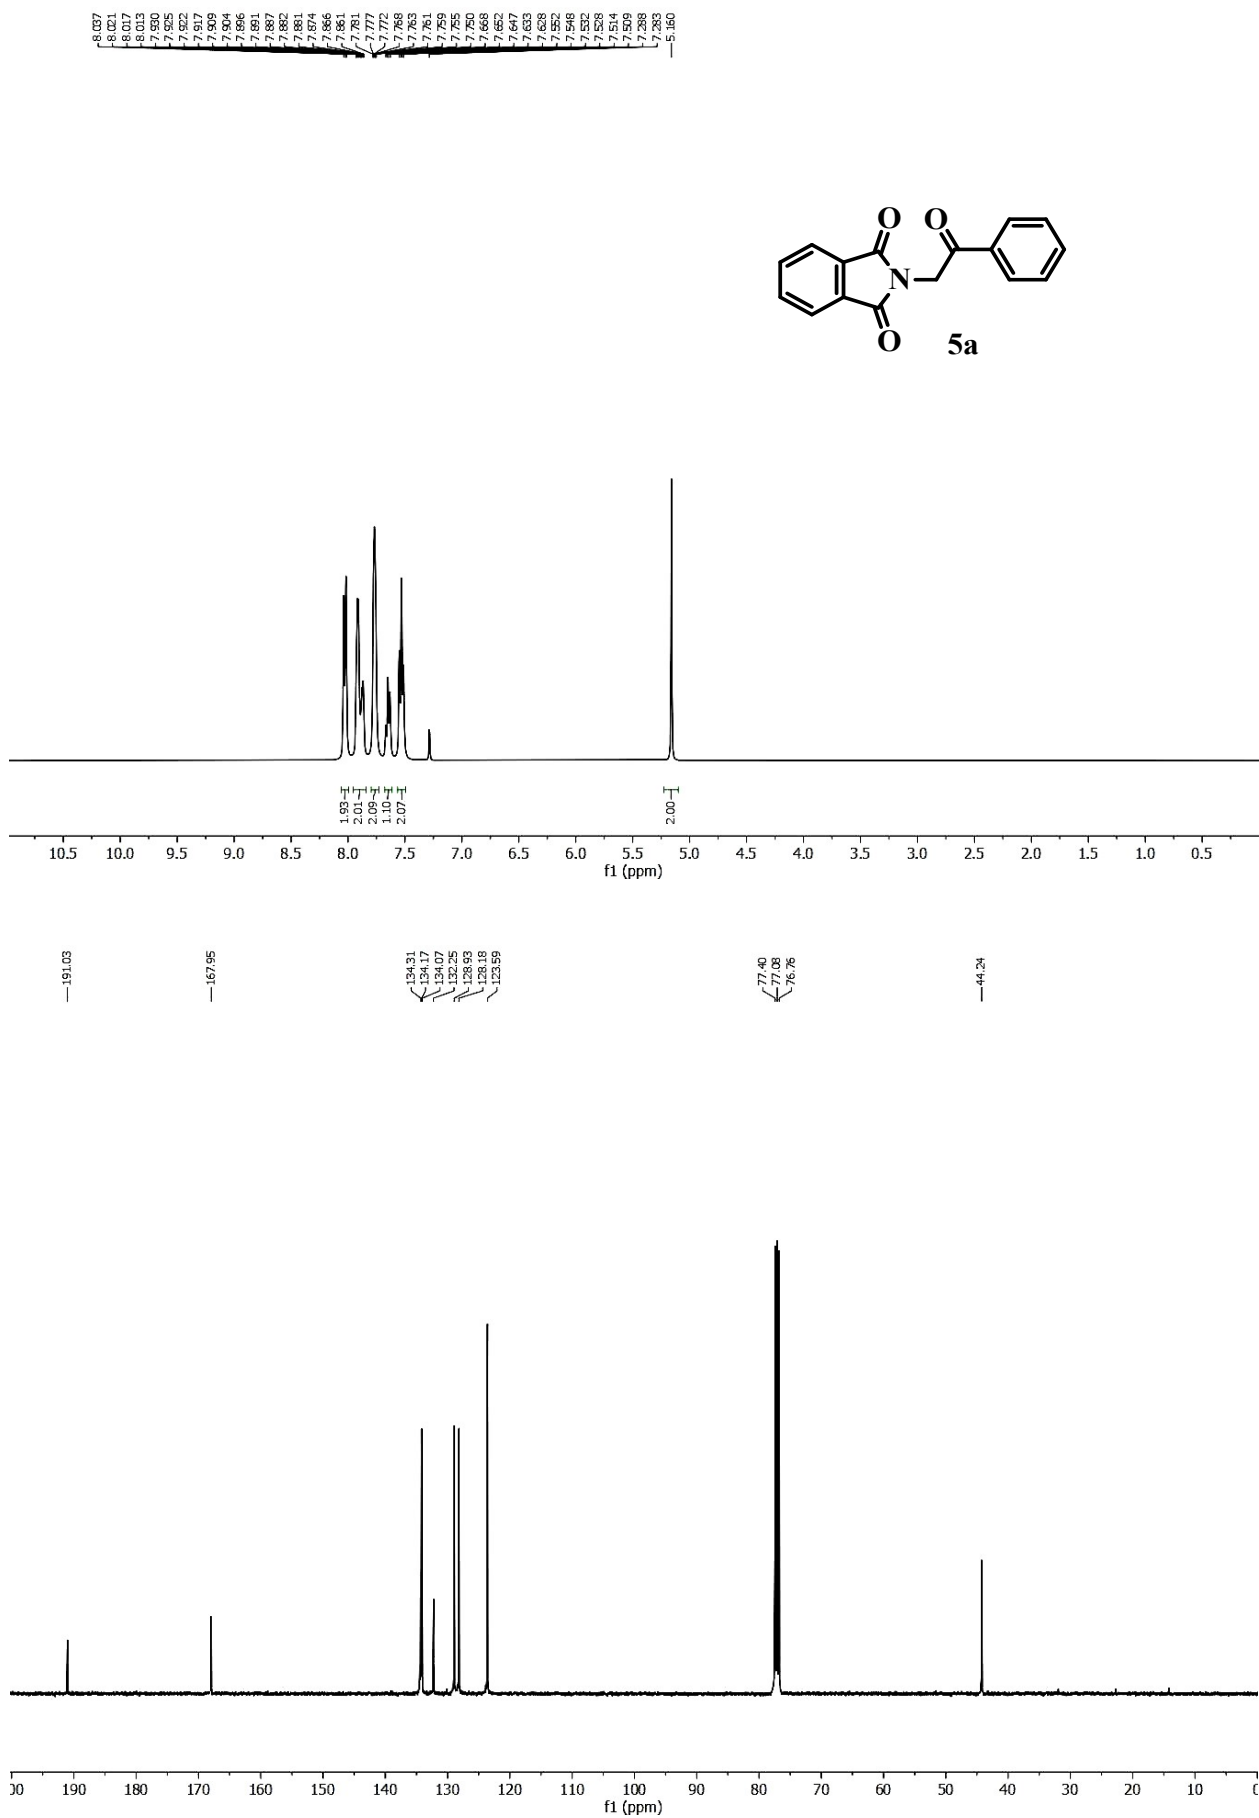

SI Figure 10:  $^1\text{H}$  and  $^{13}\text{C}$ -NMR spectra of compound **5b**

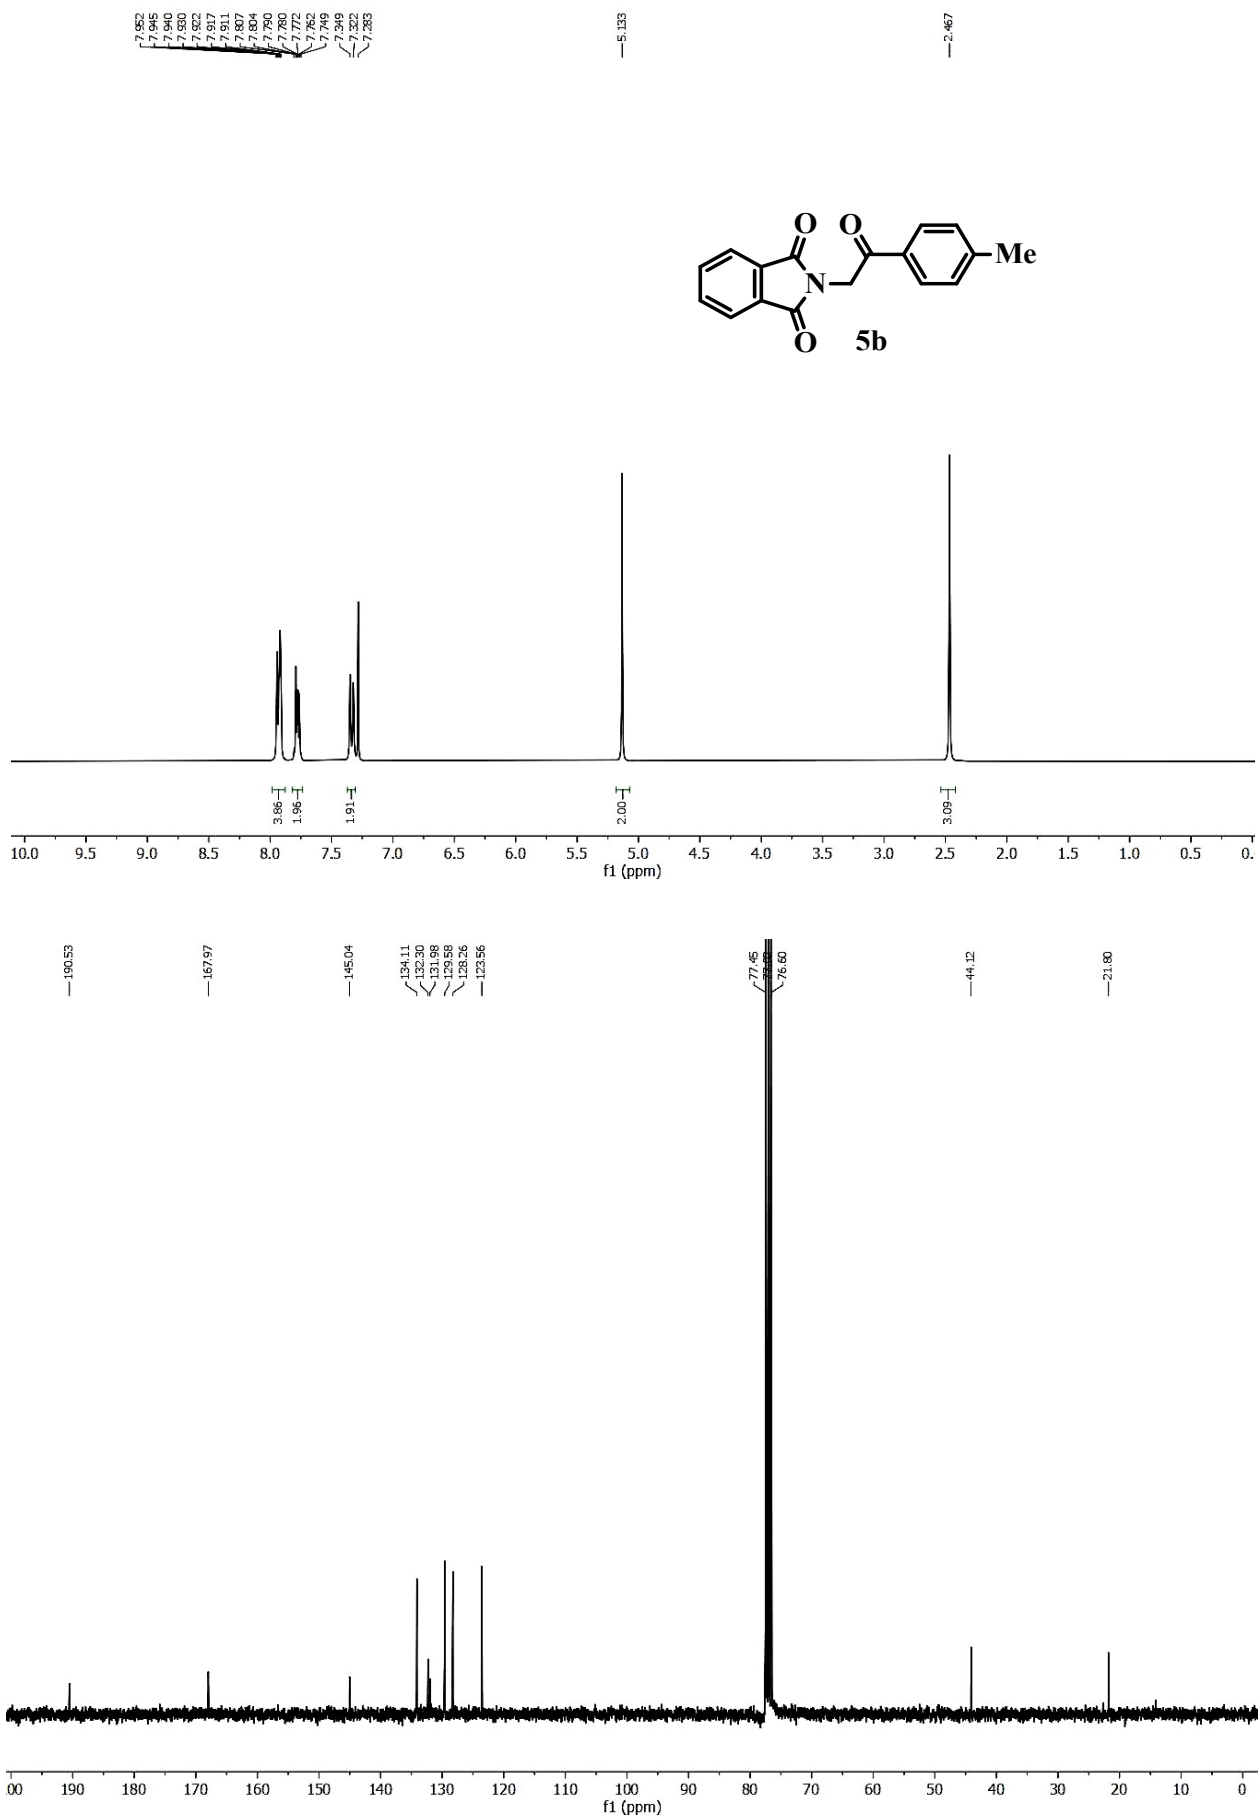

SI Figure 11:  $^1\text{H}$  and  $^{13}\text{C}$ -NMR spectra of compound **5c**

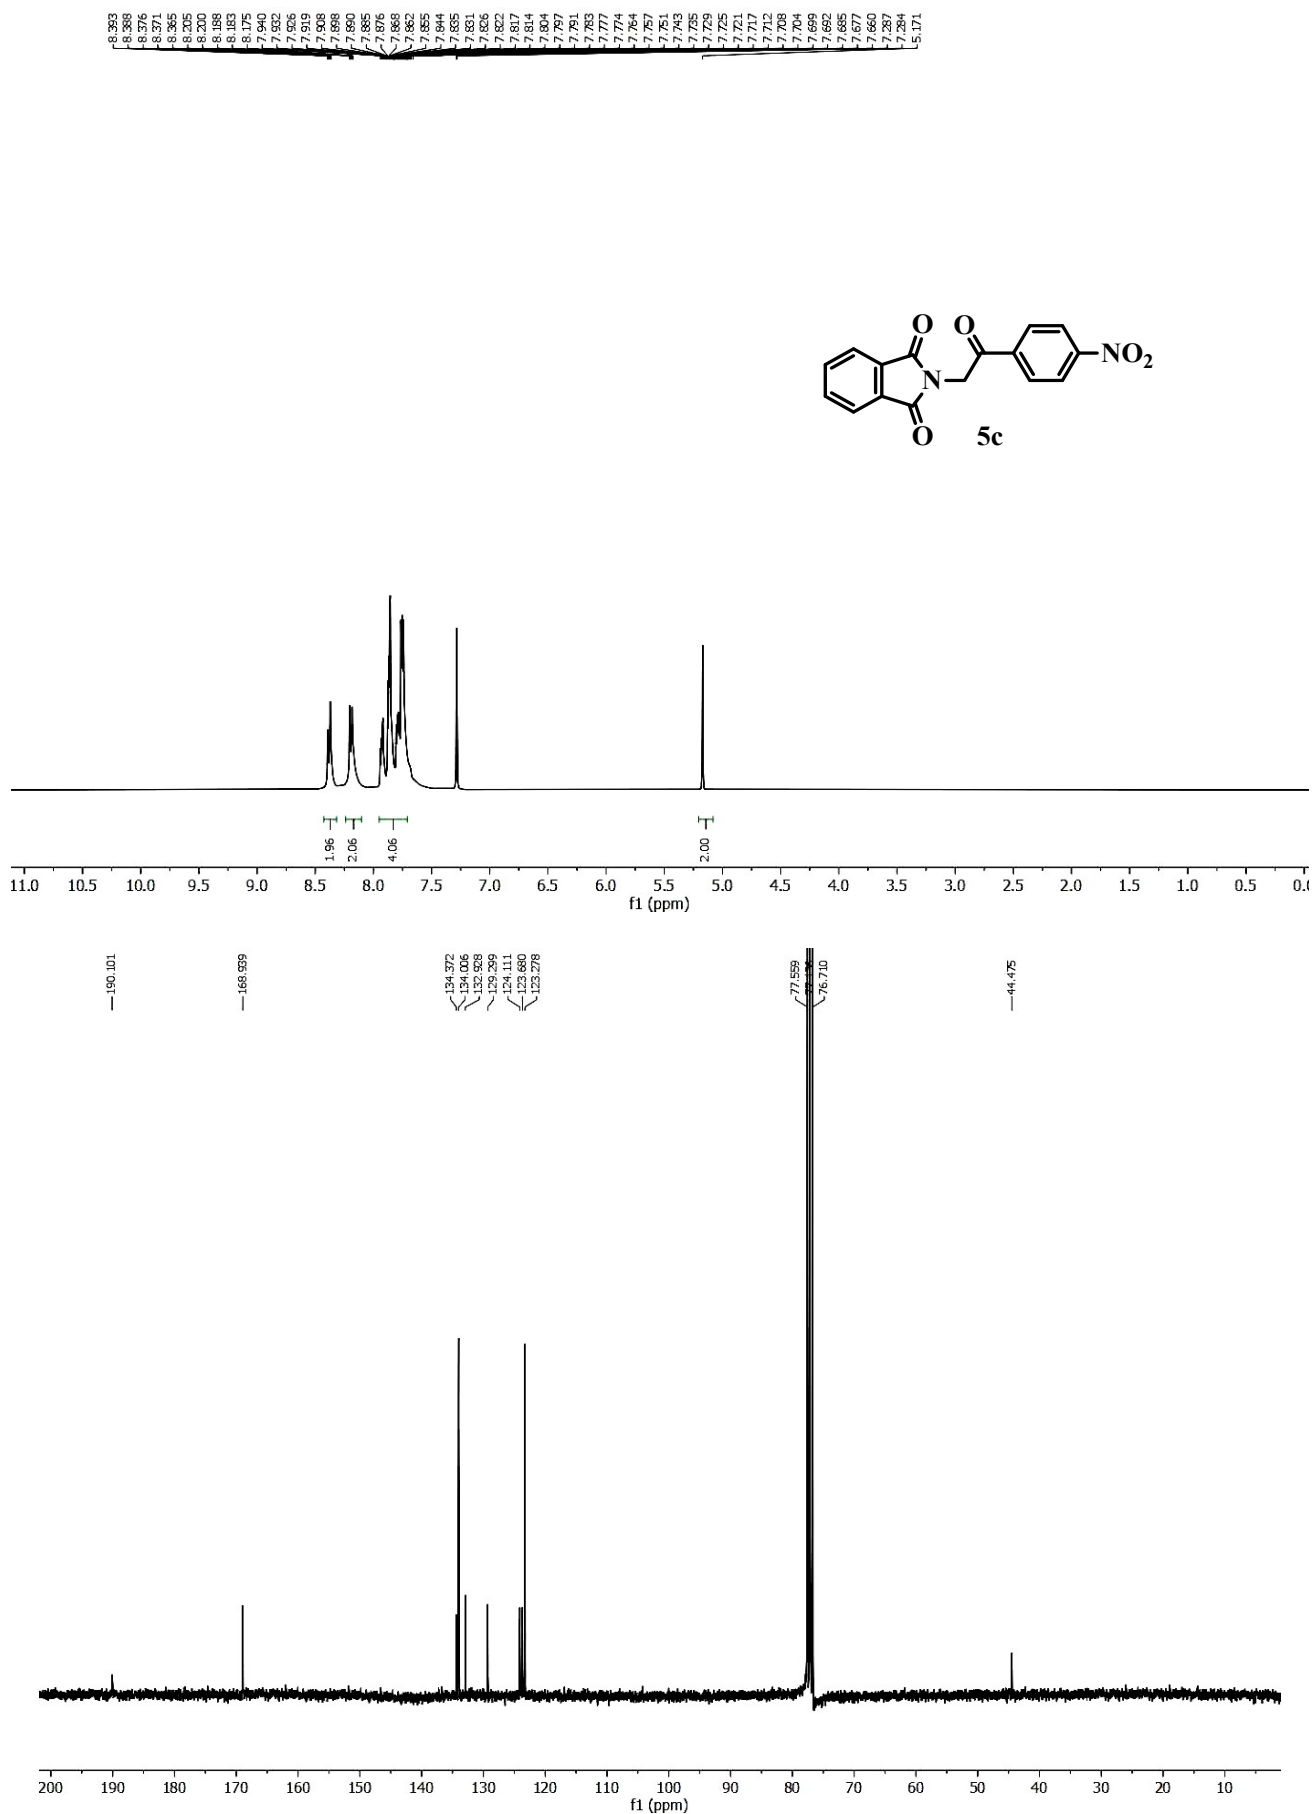

SI Figure 12:  $^1\text{H}$  and  $^{13}\text{C}$ -NMR spectra of compound **5d**

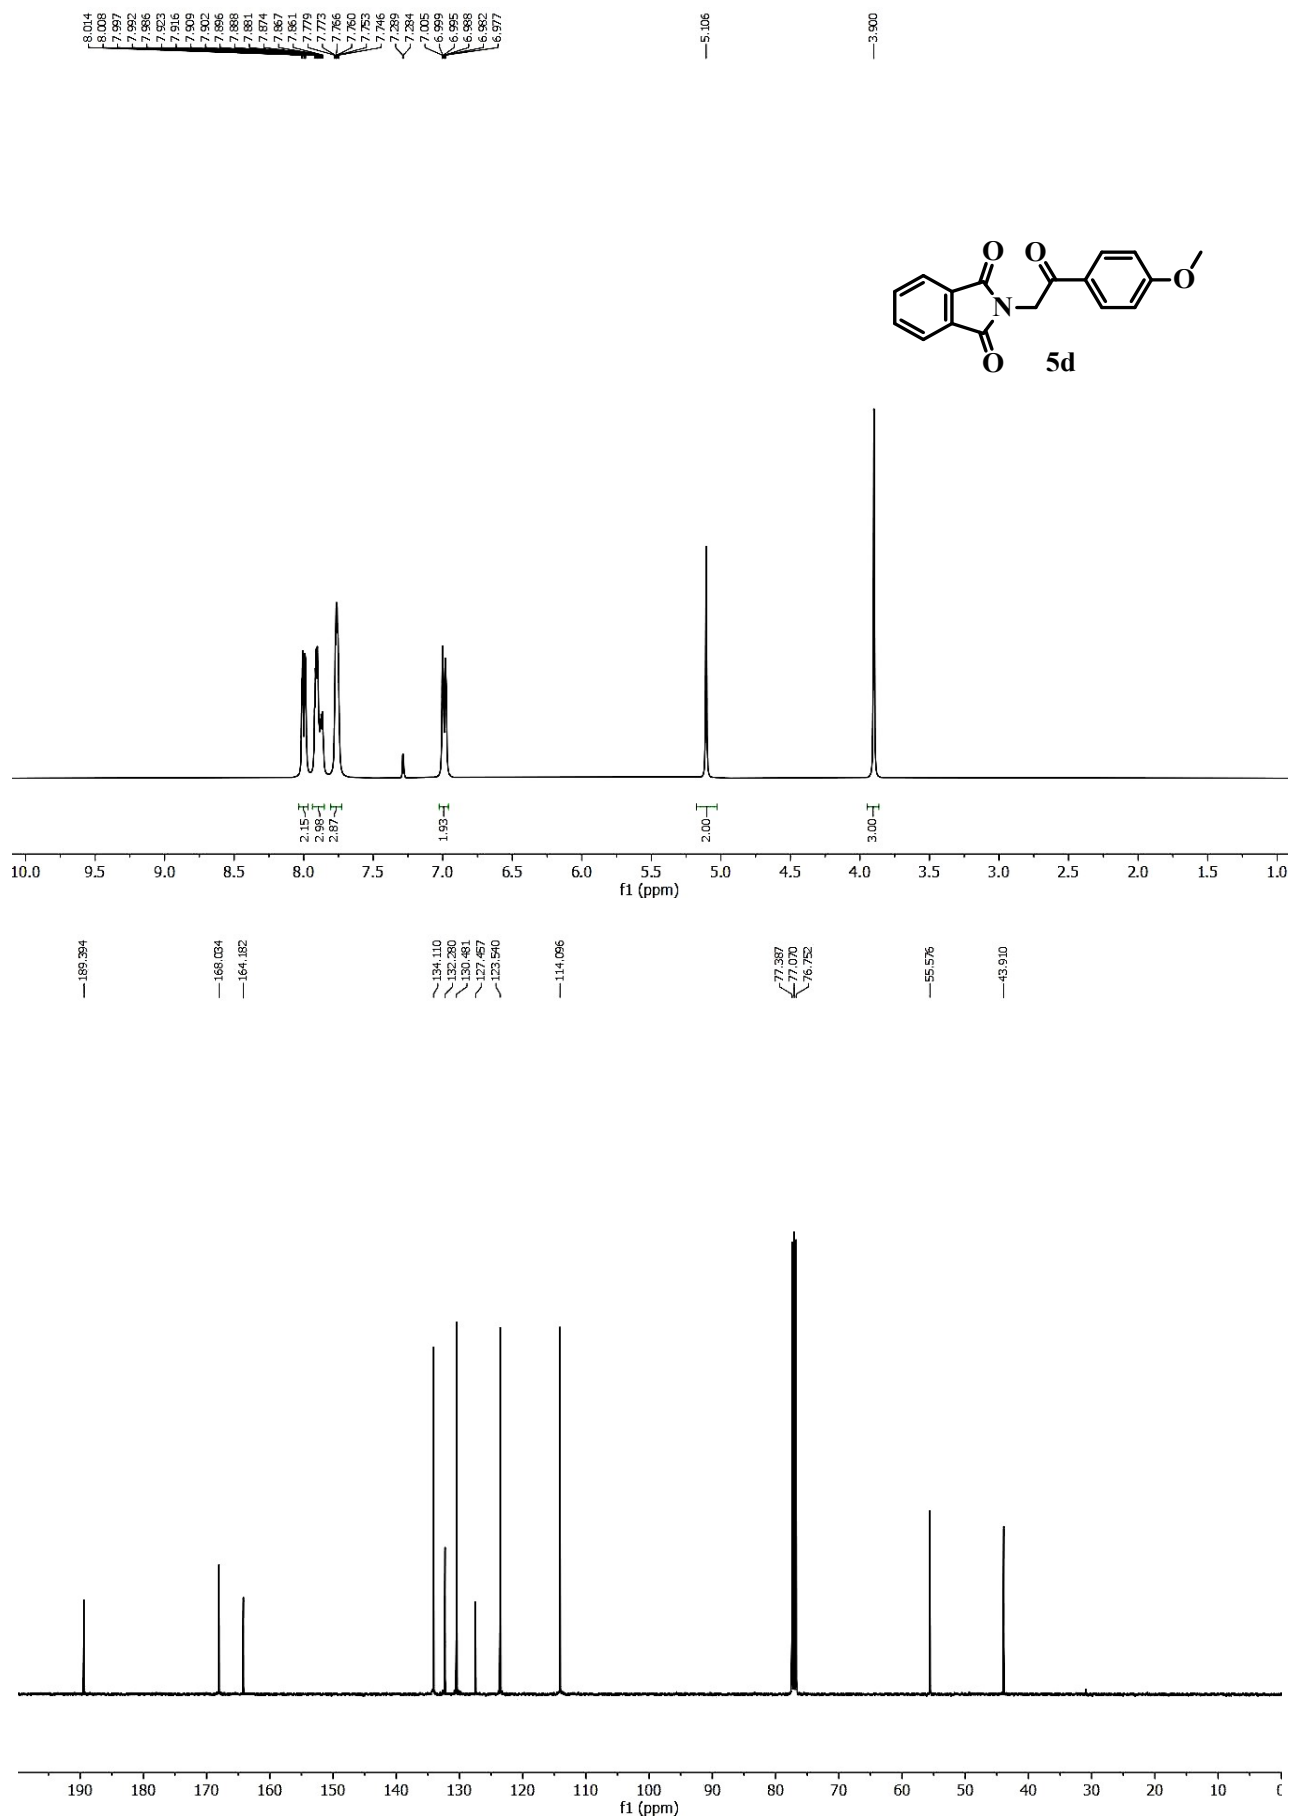

SI Figure 13:  $^1\text{H}$  and  $^{13}\text{C}$ -NMR spectra of compound **5e**

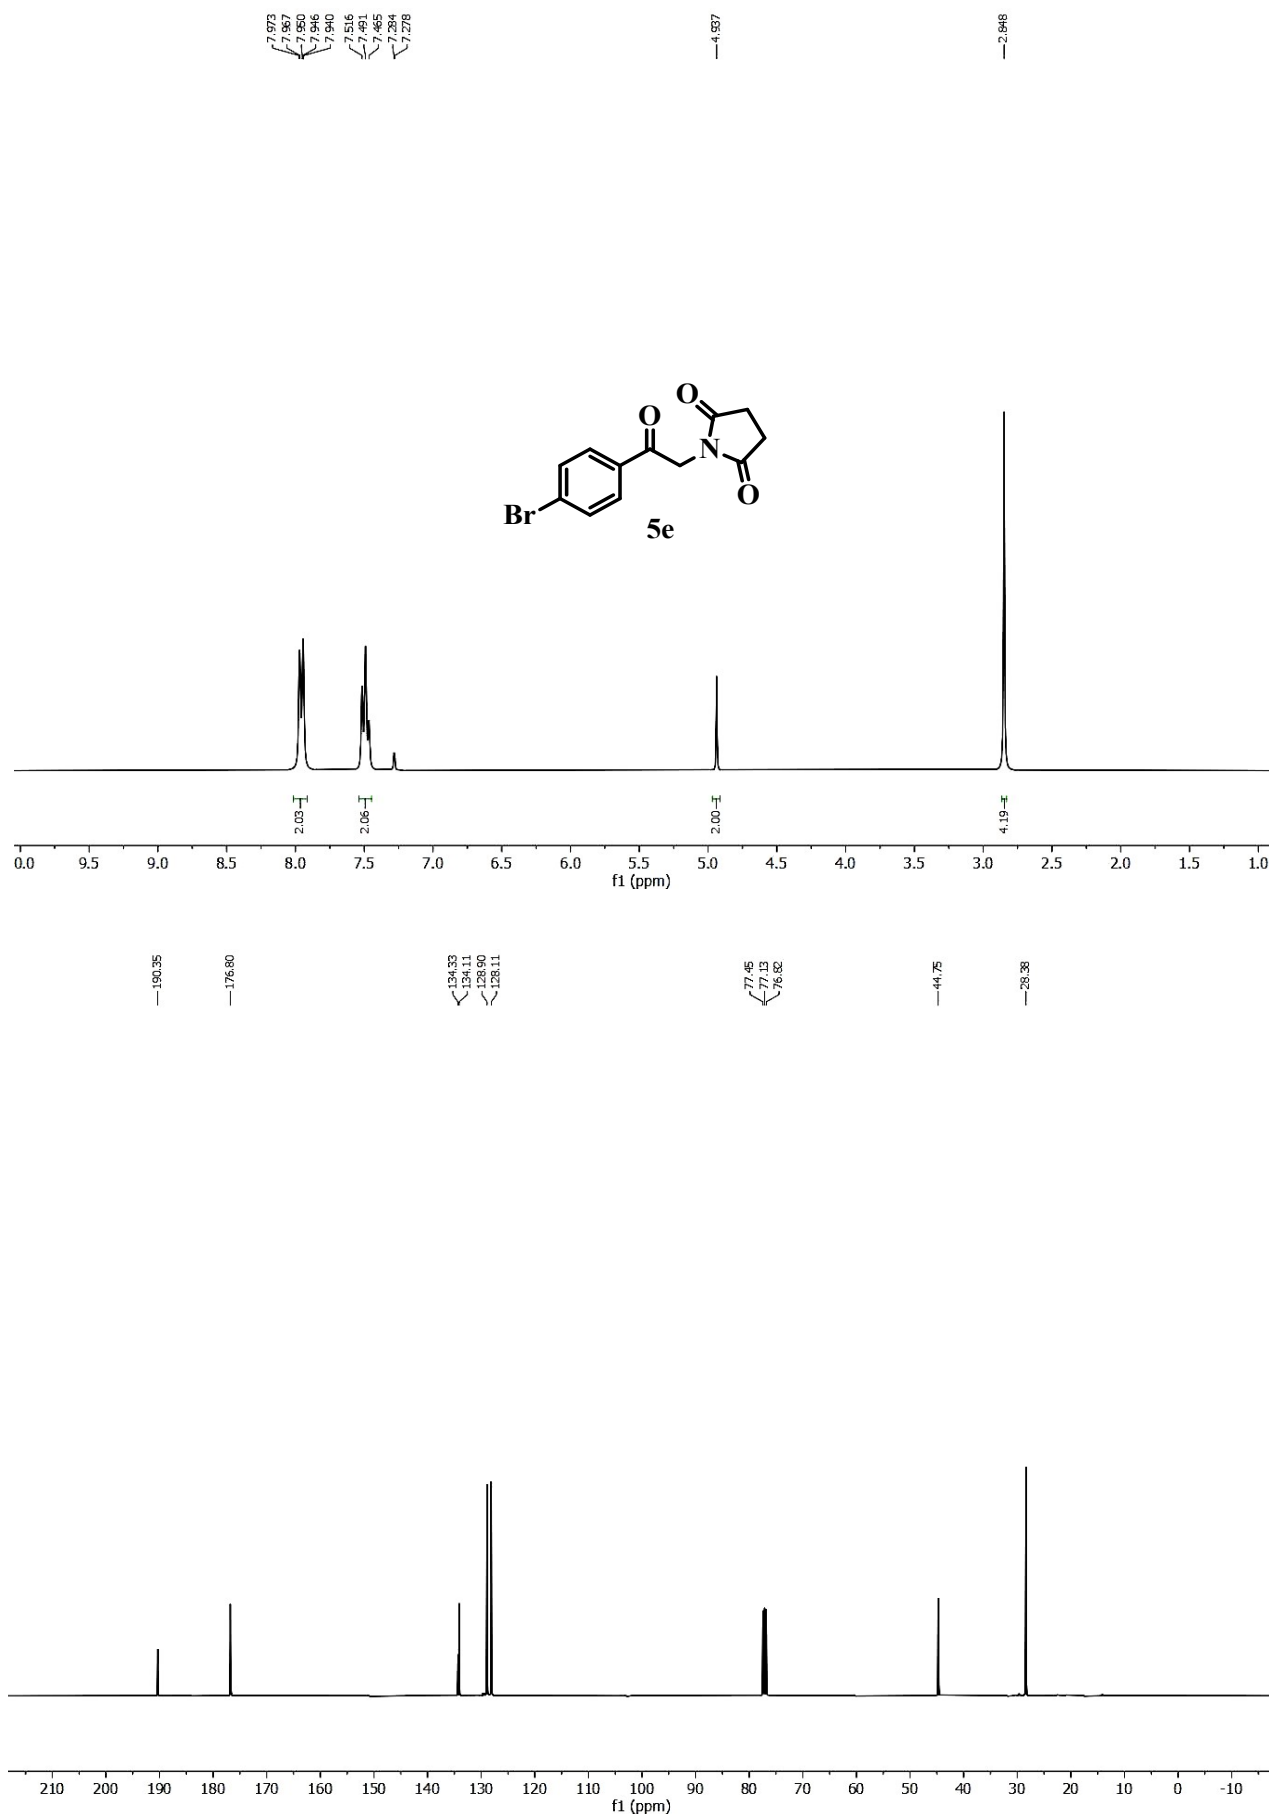

SI Figure 14:  $^1\text{H}$  and  $^{13}\text{C}$ -NMR spectra of compound **5f**

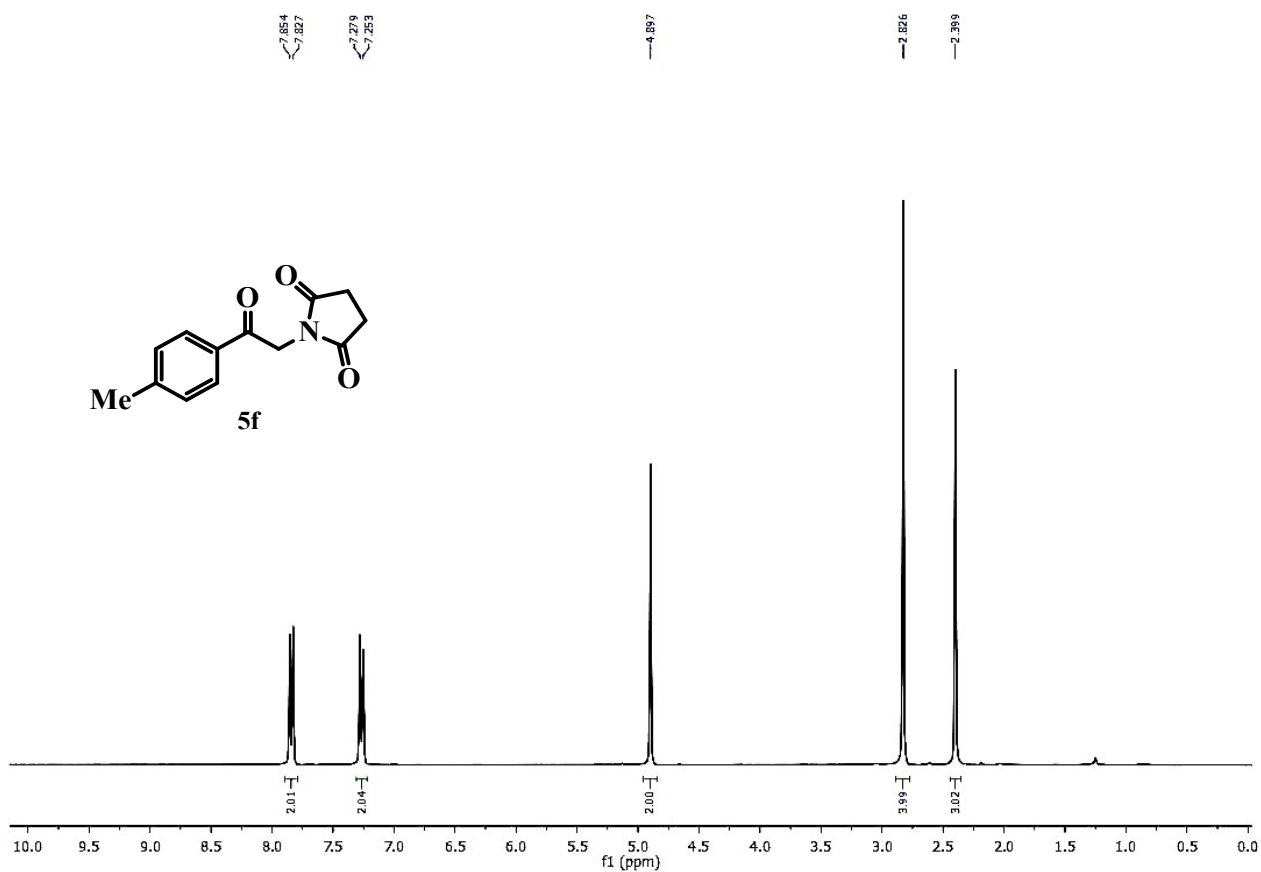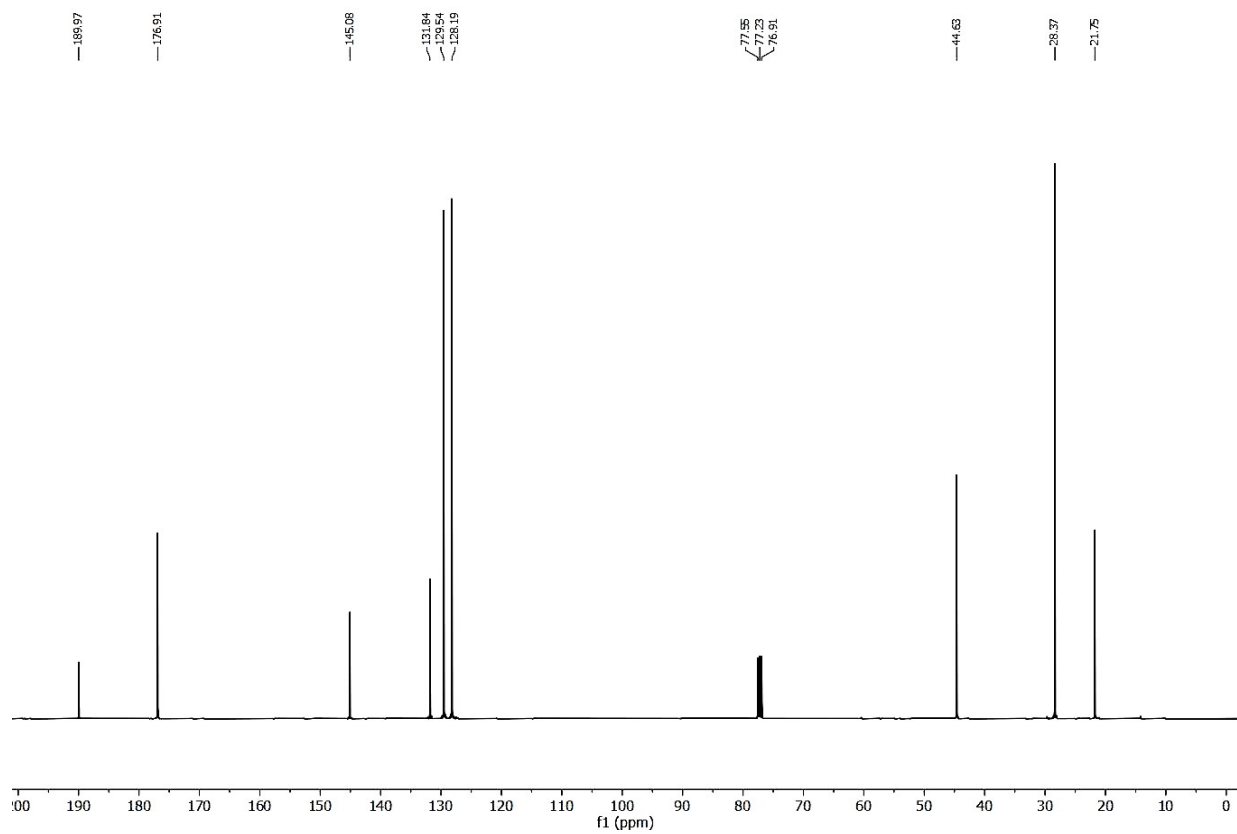

SI Figure 15:  $^1\text{H}$  and  $^{13}\text{C}$ -NMR spectra of compound **5g**

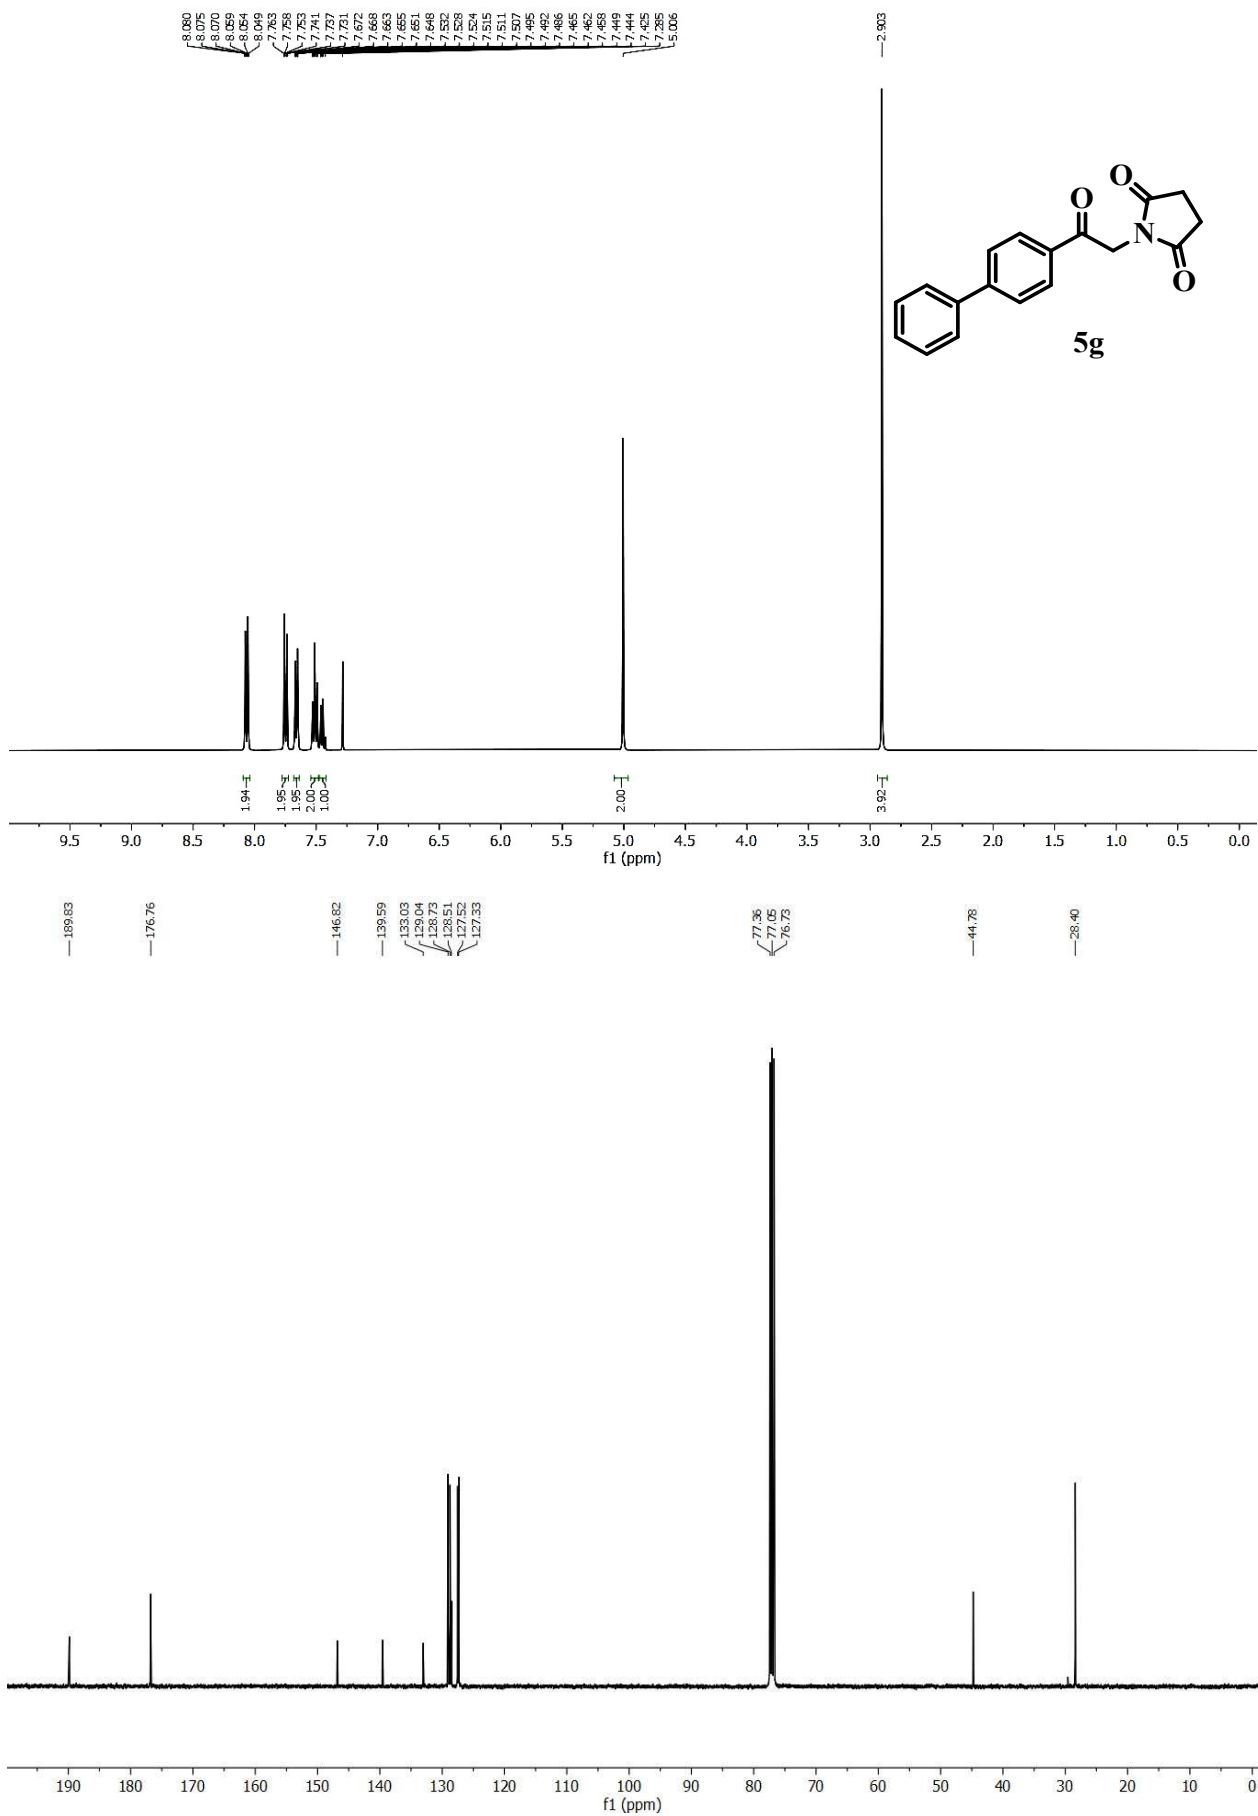



SI Figure 16: <sup>1</sup>H and <sup>13</sup>C-NMR spectra of compound 6a

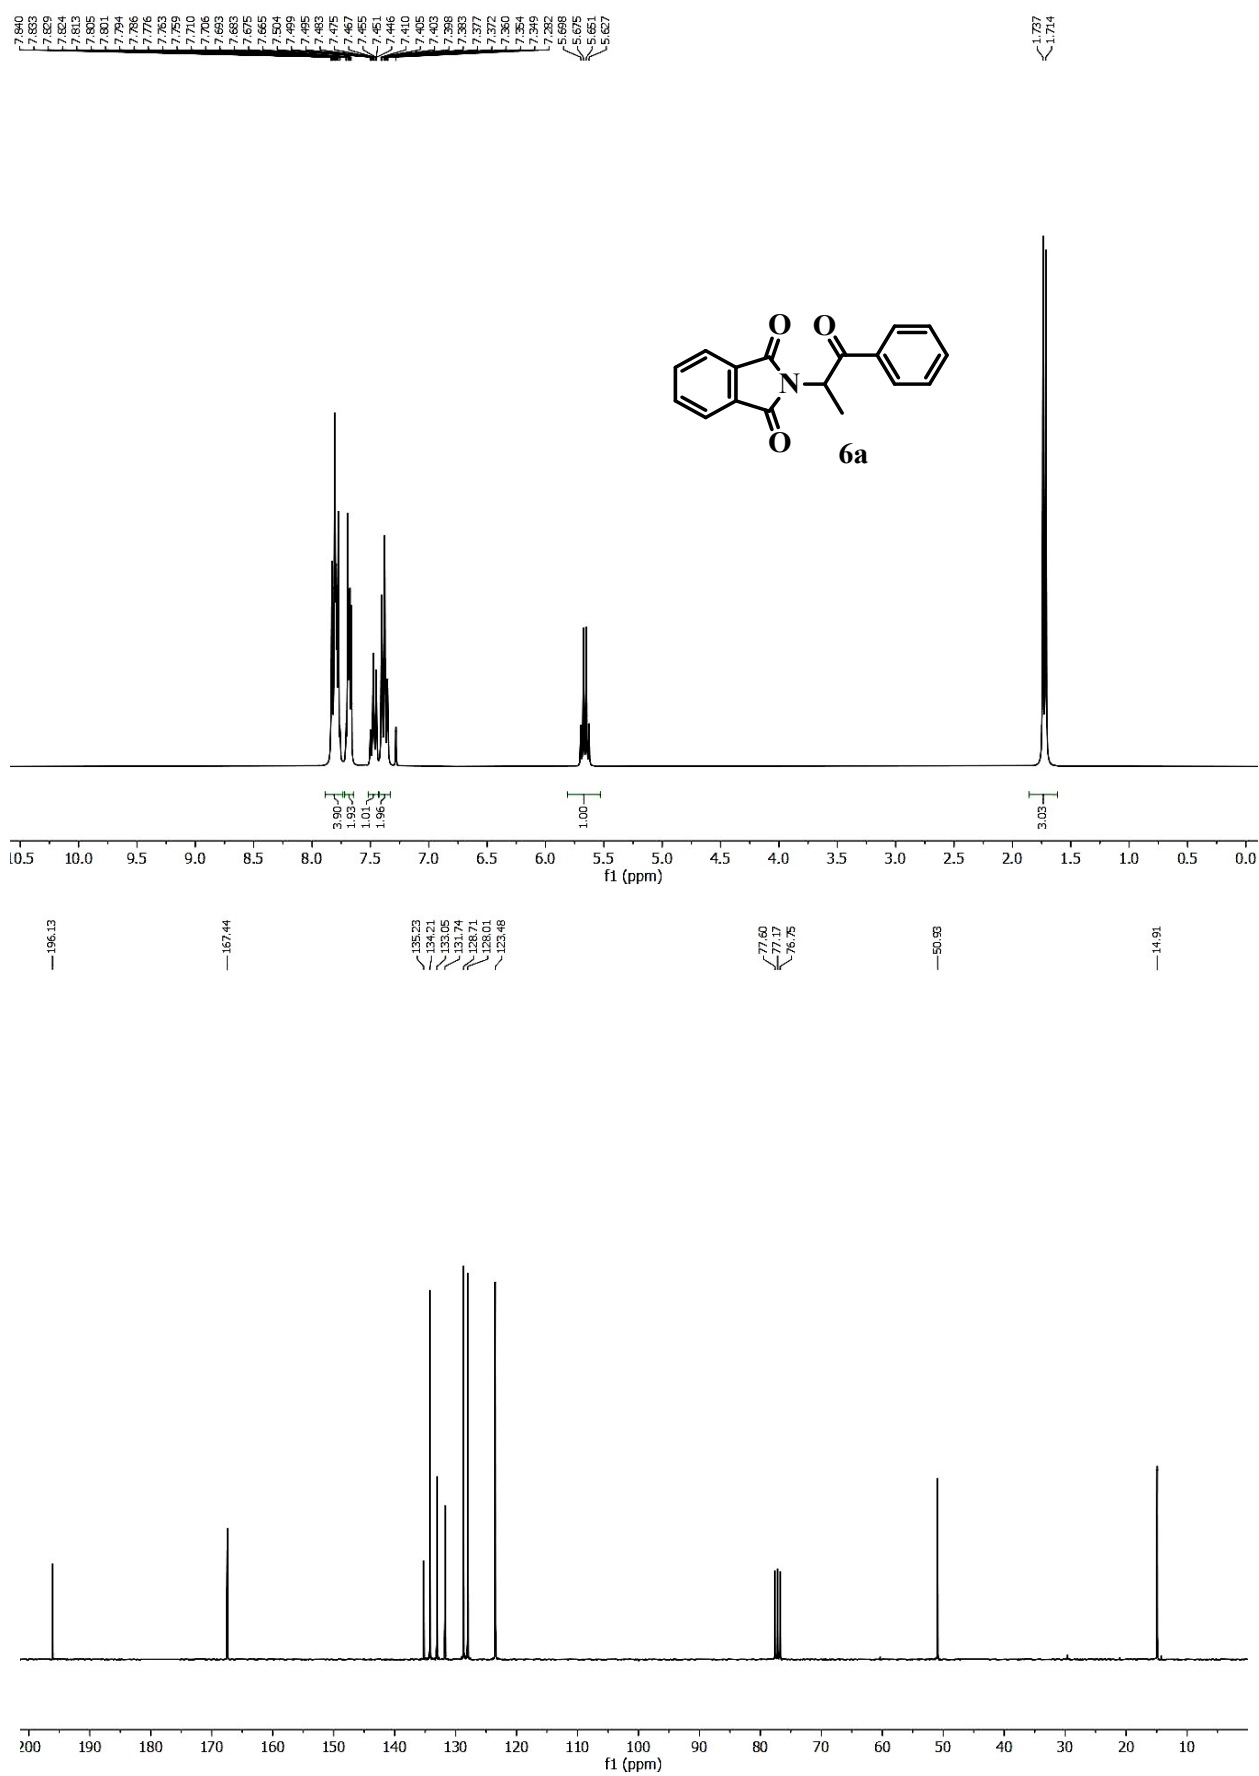

SI Figure 17:  $^1\text{H}$  and  $^{13}\text{C}$ -NMR spectra of compound 7

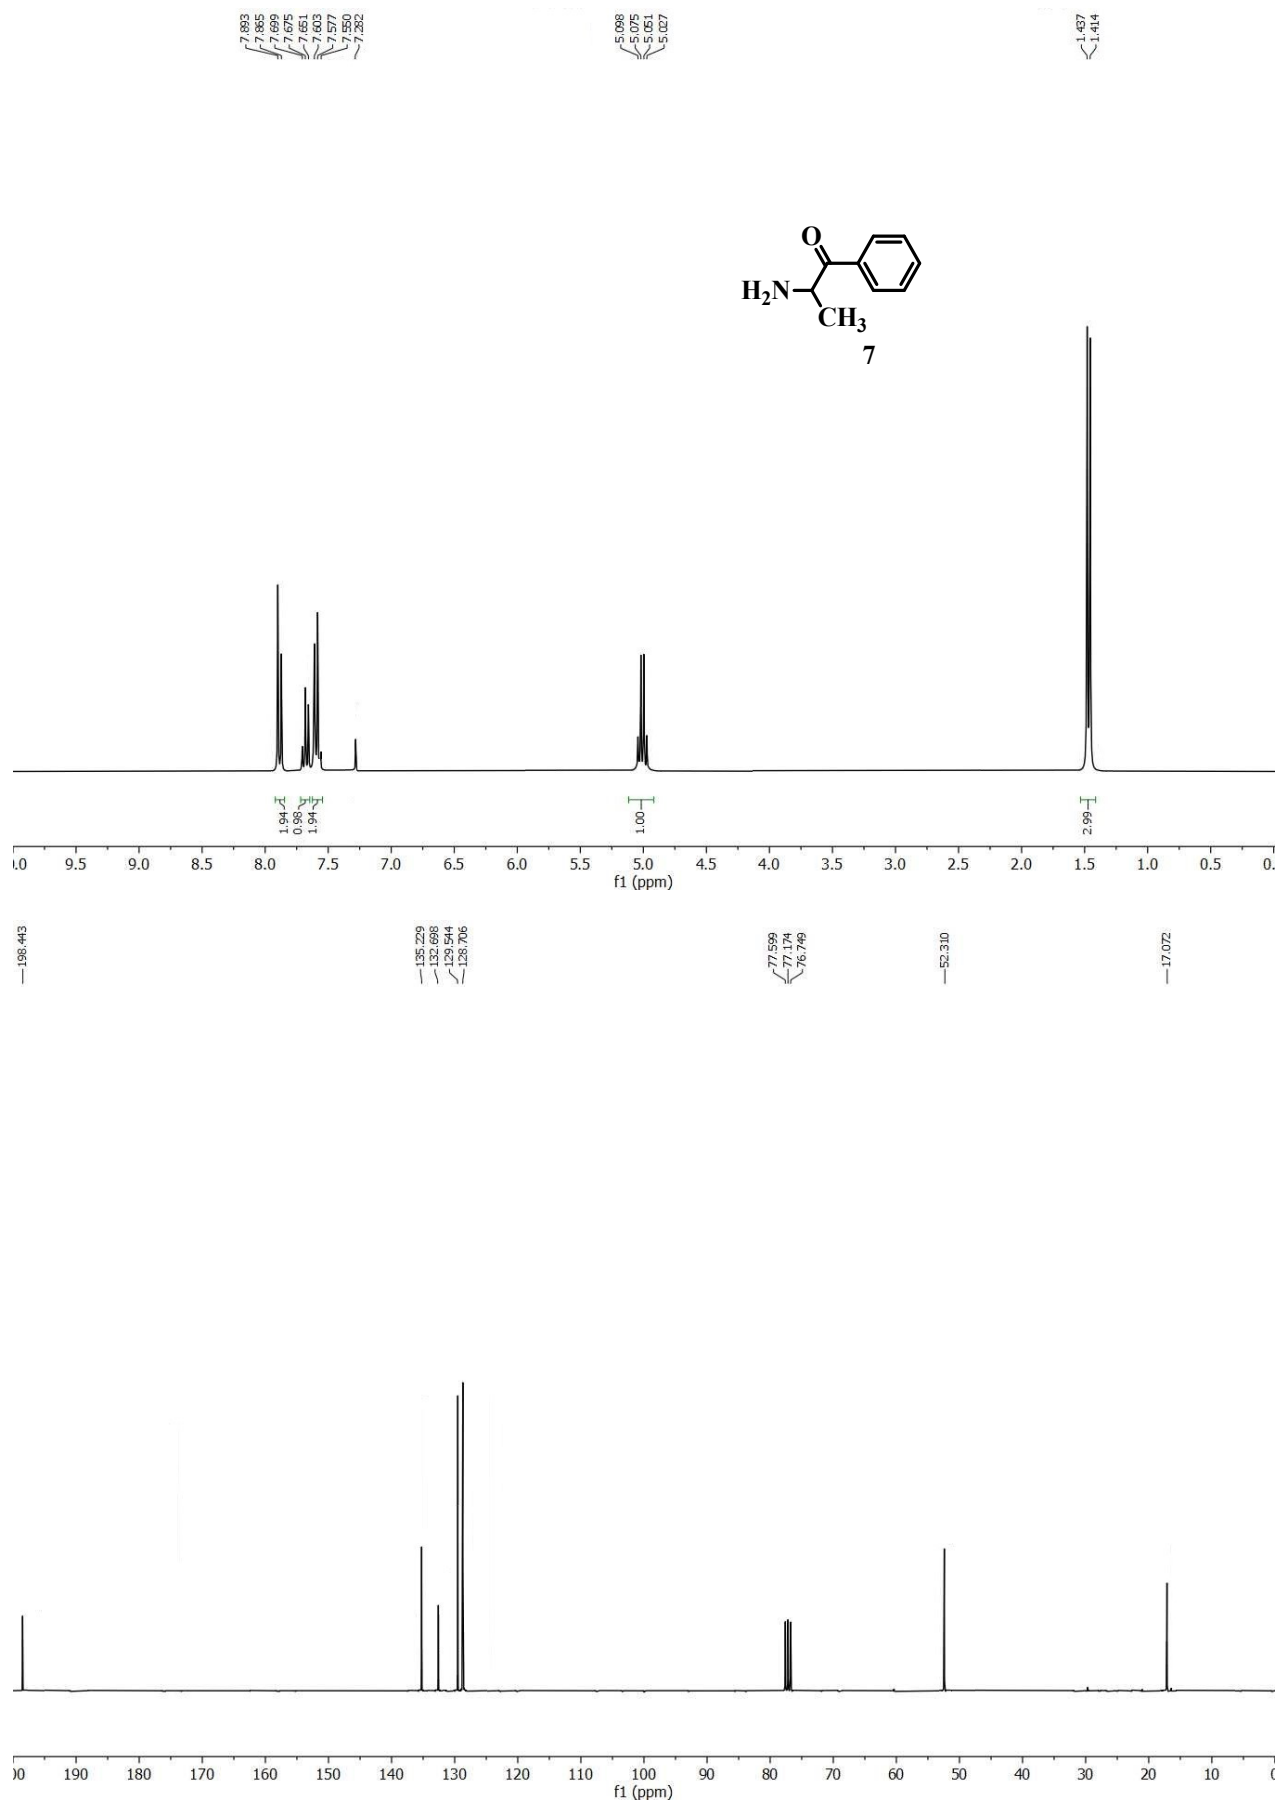

SI Figure 18:  $^1\text{H}$  and  $^{13}\text{C}$ -NMR spectra of compound **8a**

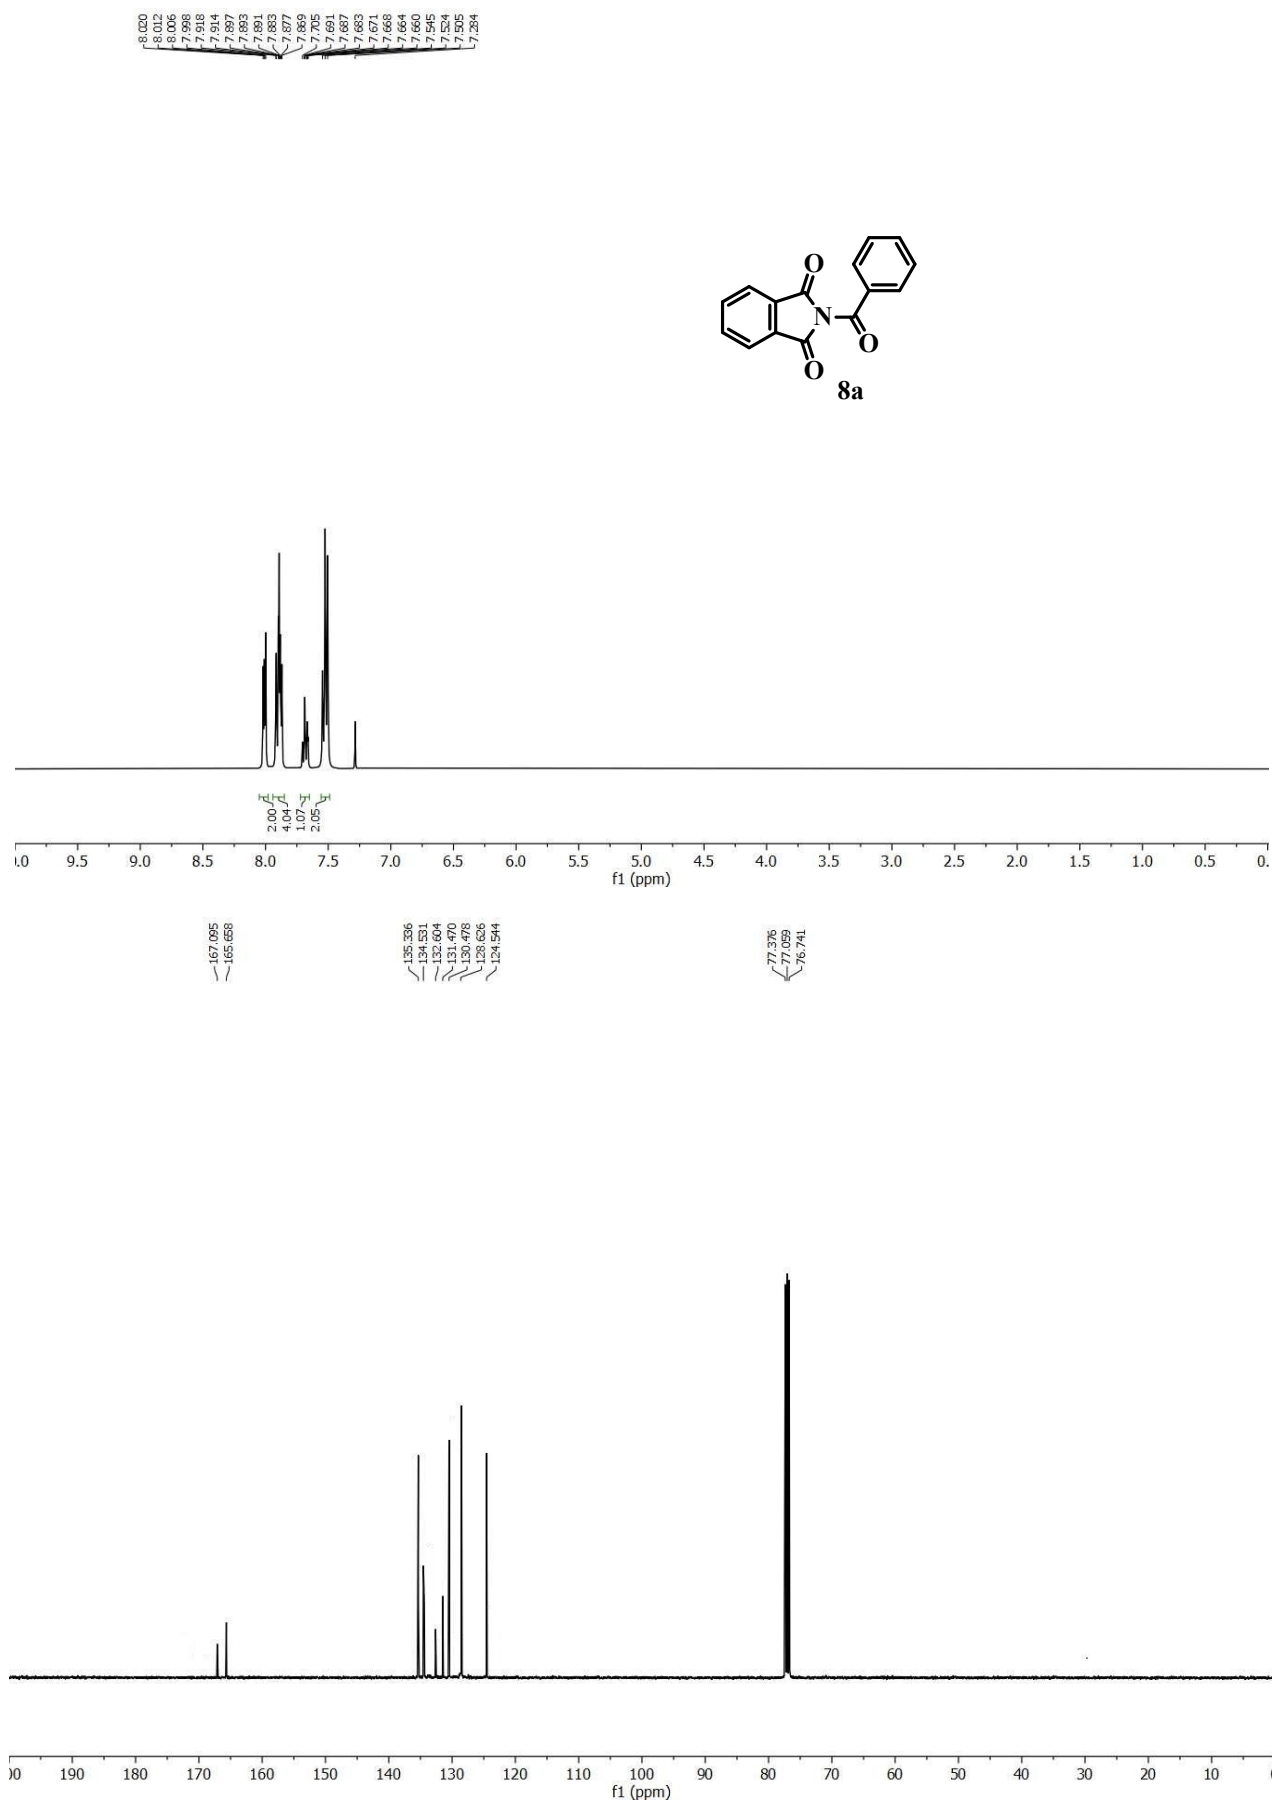

Supplement: d3ob00582h2.pdf [file d3ob00582h2.pdf]
